# Supplementary material for: Cancer risks in recipients of renal transplants: a meta-analysis of cohort studies
Source: PubMed Central journal article supplement (PMC5880611; doi:10.18632/oncotarget.23841), 2017-12-16
Supplement: oncotarget-09-15375-s001.pdf [file oncotarget-09-15375-s001.pdf]

# Cancer risks in recipients of renal transplants: a meta-analysis of cohort studies

## SUPPLEMENTARY MATERIALS

### Supplementary 1

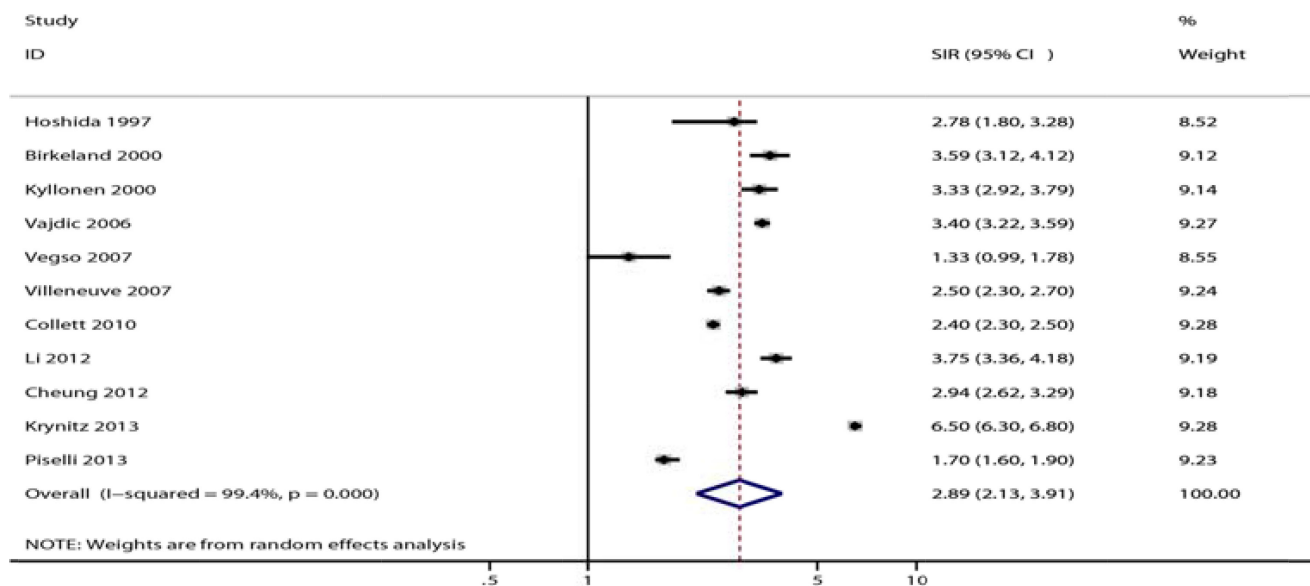

Supplementary Figure 1: All cancer risk in renal transplant recipients.

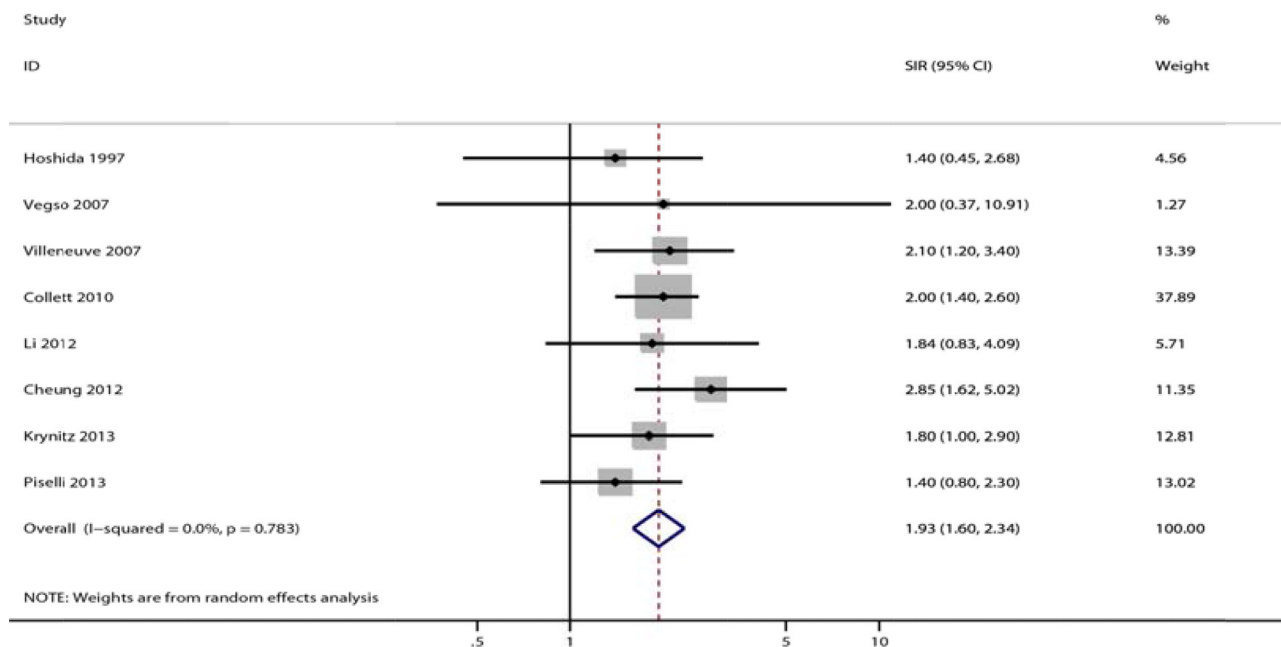

Supplementary Figure 2: Gastric cancer risk in renal transplant recipients.

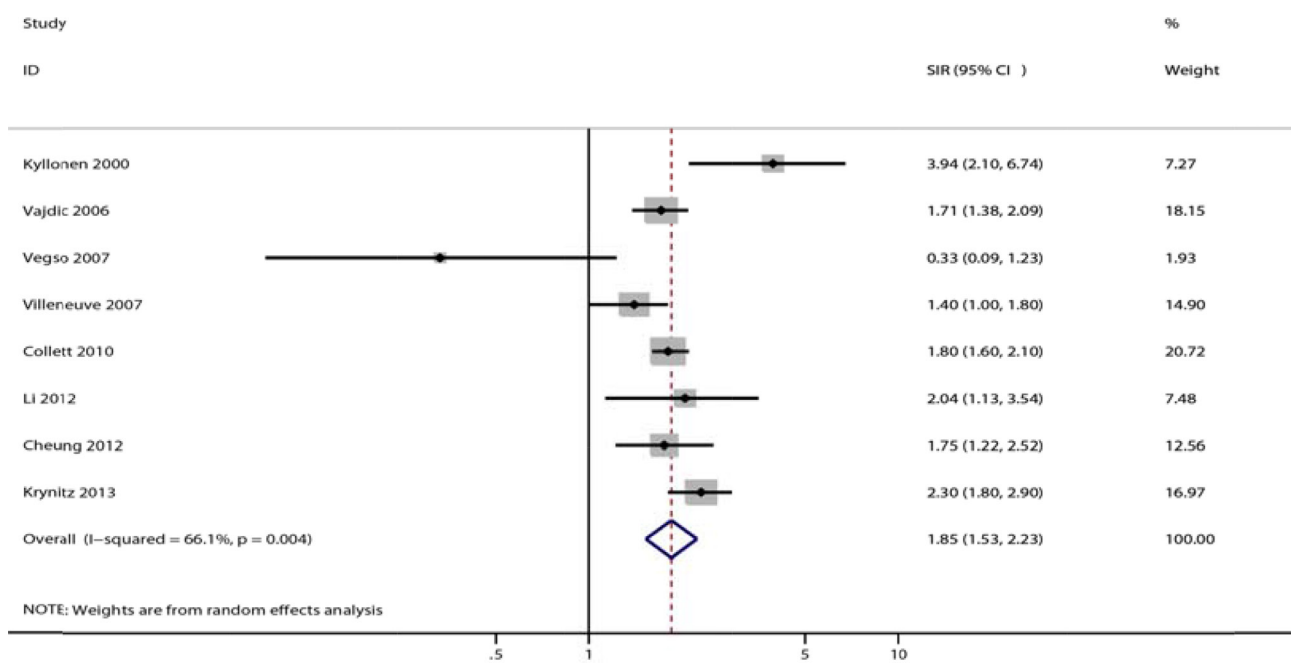

Supplementary Figure 3: Colon cancer risk in renal transplant recipients.

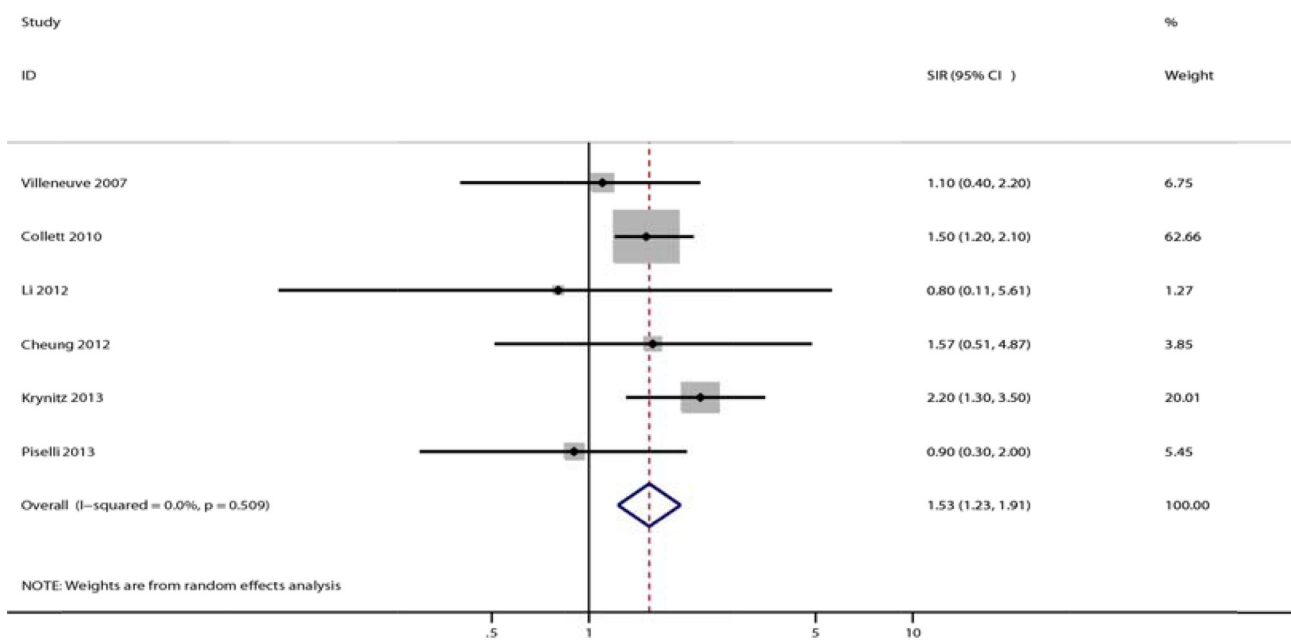

Supplementary Figure 4: Pancreatic cancer risk in renal transplant recipients.

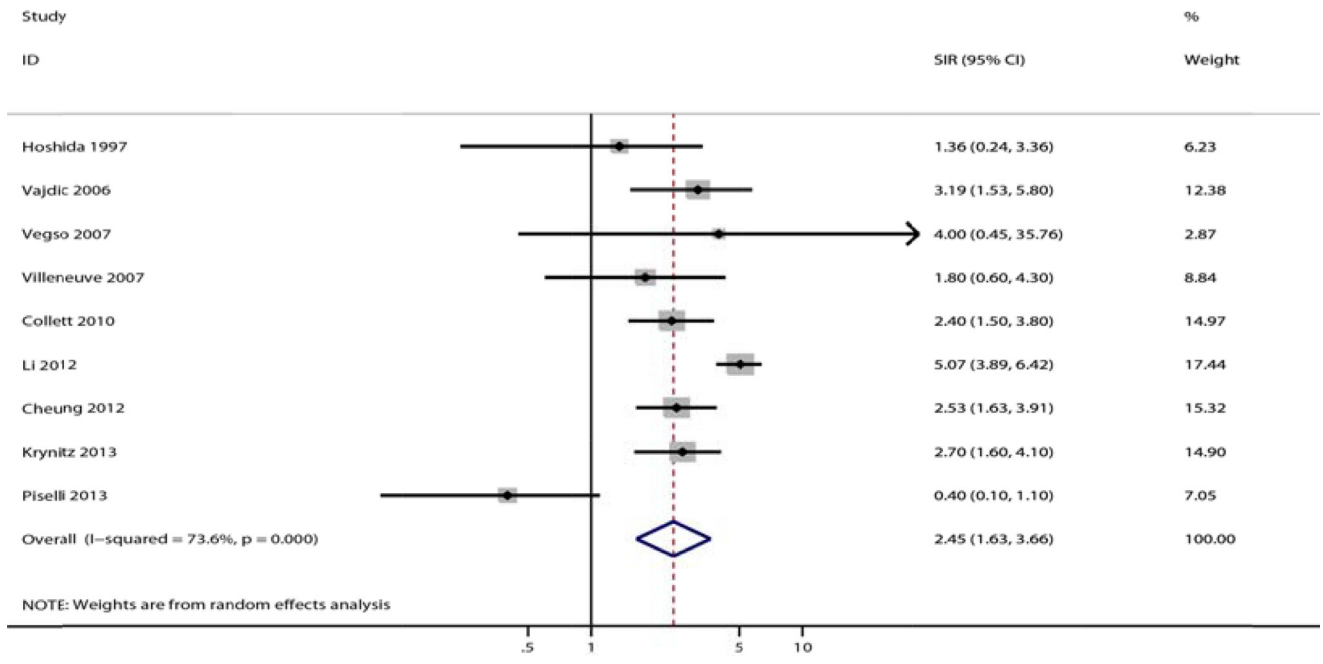

Supplementary Figure 5: Hepatocellular carcinoma risk in renal transplant recipients.

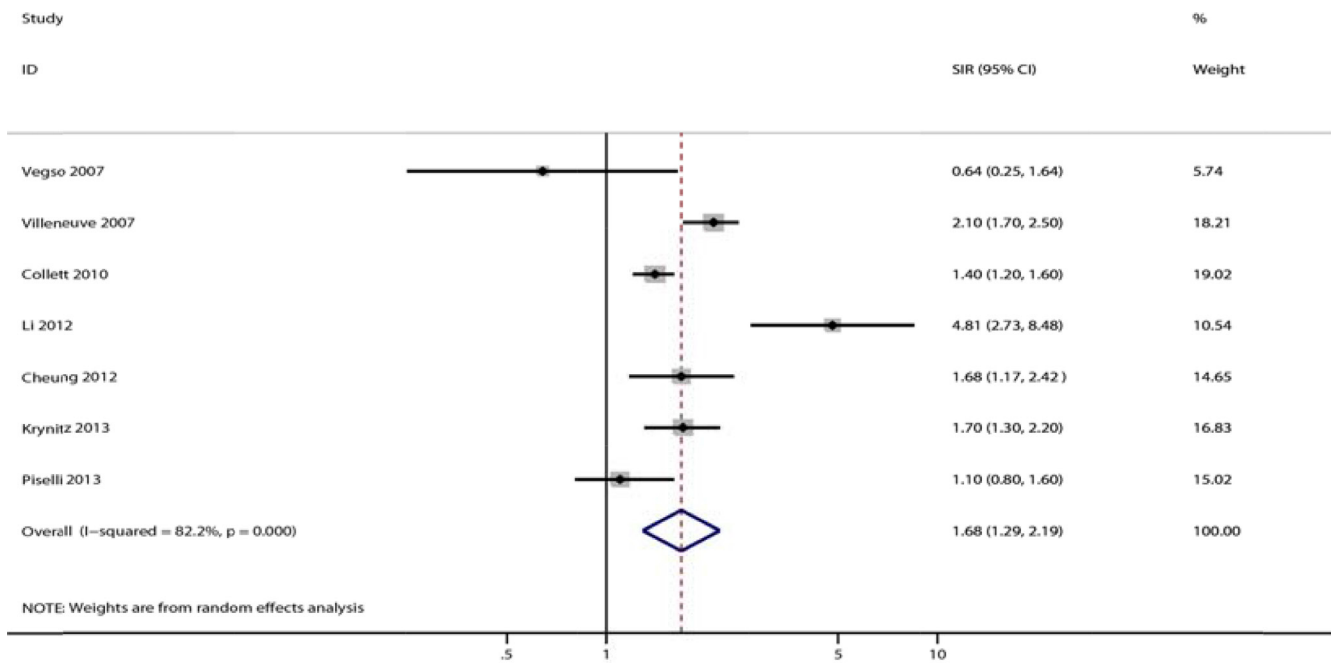

Supplementary Figure 6: Lung cancer risk in renal transplant recipients.

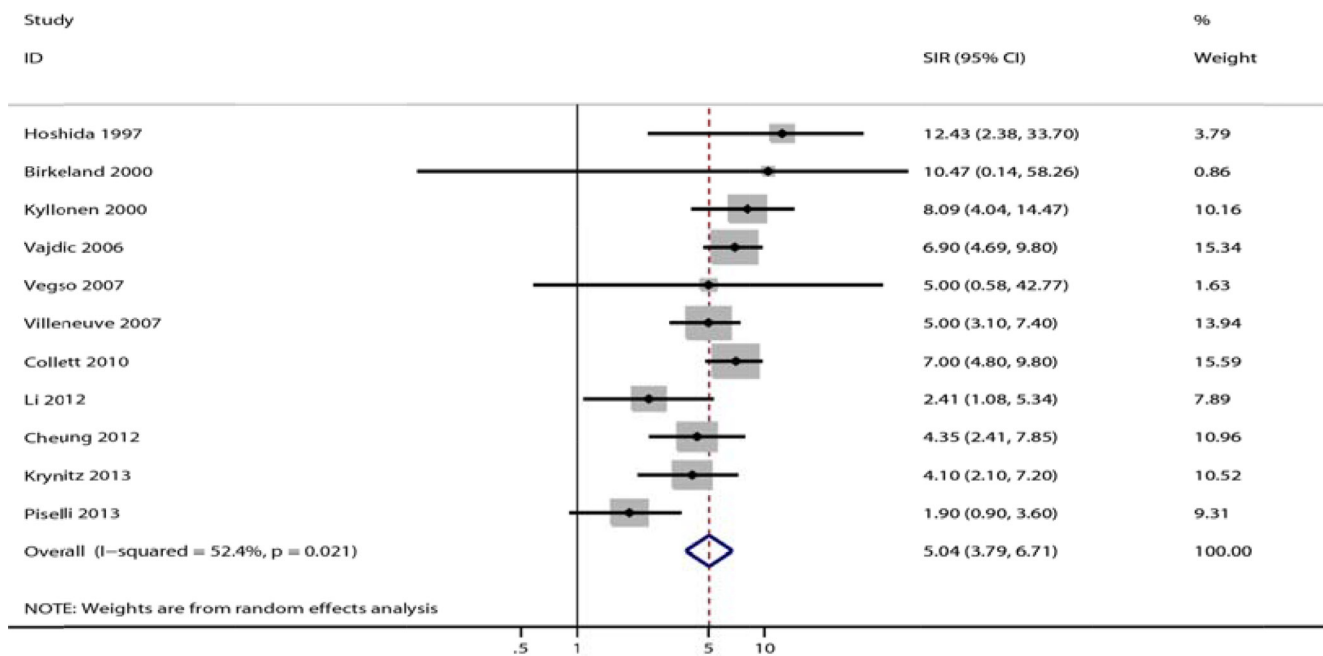

Supplementary Figure 7: Thyroid cancer risk in renal transplant recipients.

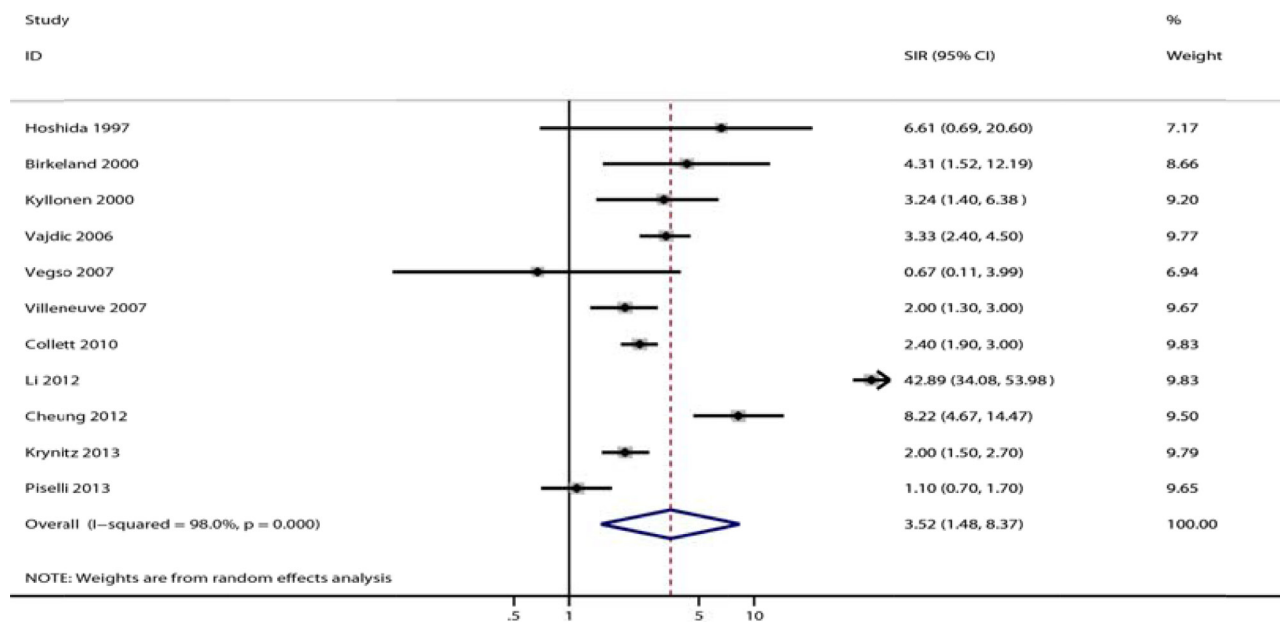

Supplementary Figure 8: Urinary bladder cancer risk in renal transplant recipients.

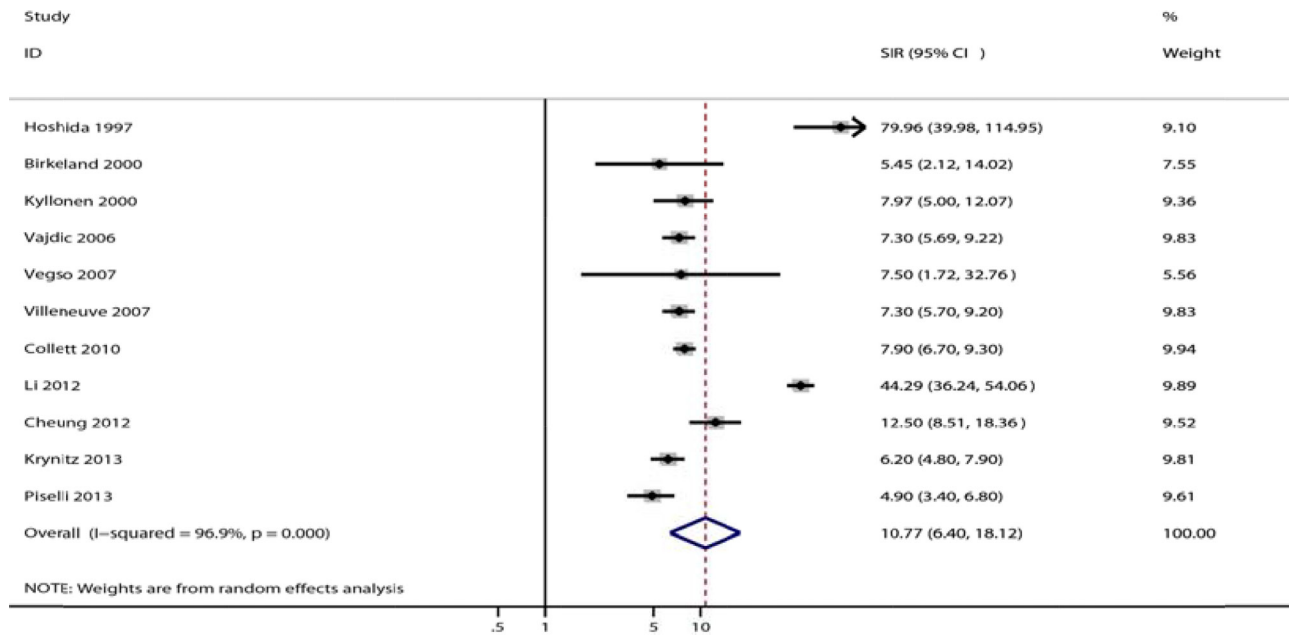

Supplementary Figure 9: Renal cell cancer risk in renal transplant recipients.

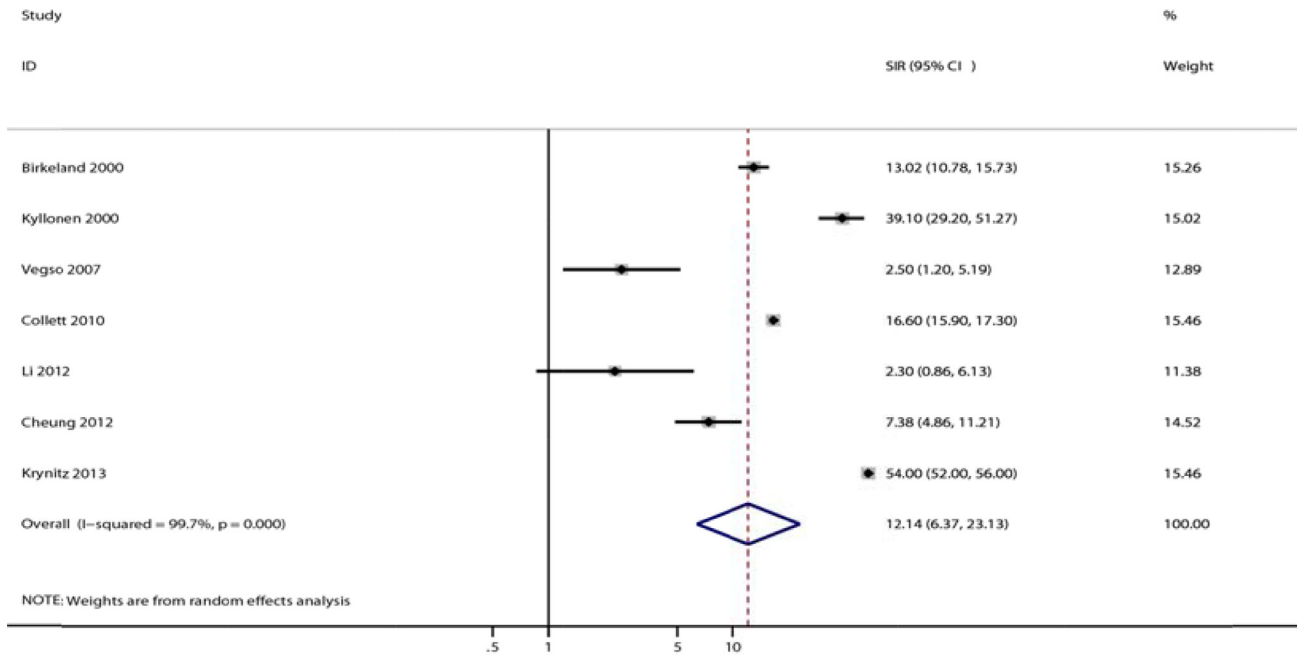

Supplementary Figure 10: Non-melanoma skin cancer risk in renal transplant recipients.

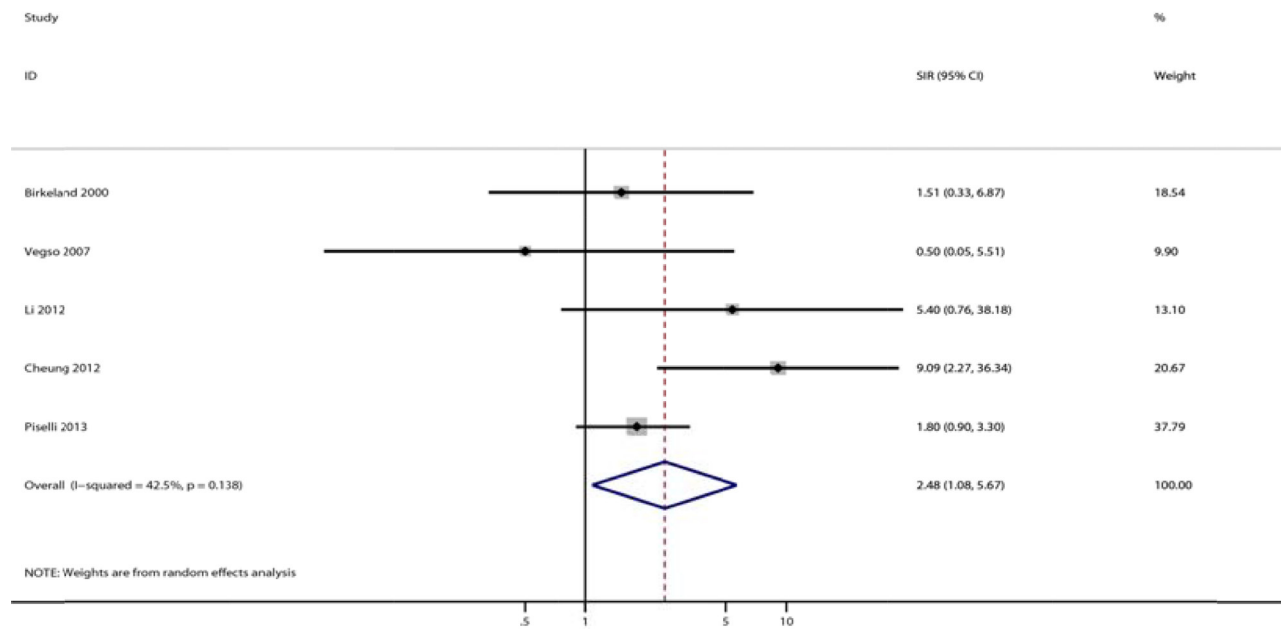

Supplementary Figure 11: Melanoma risk in renal transplant recipients.

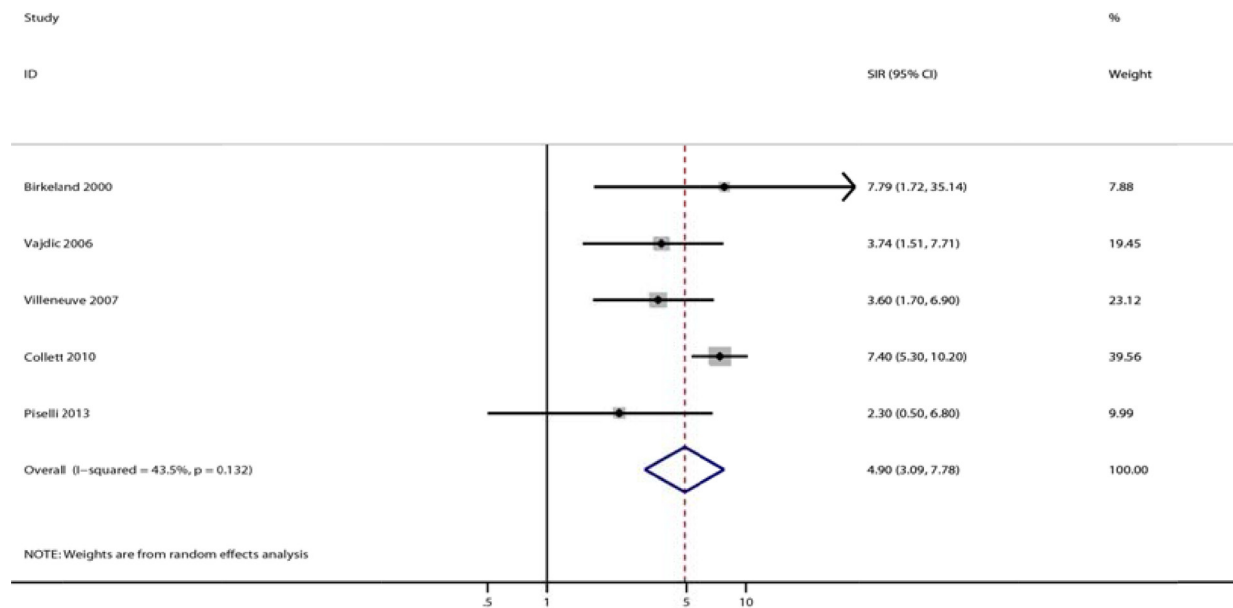

Supplementary Figure 12: Hodgkin's lymphoma risk in renal transplant recipients.

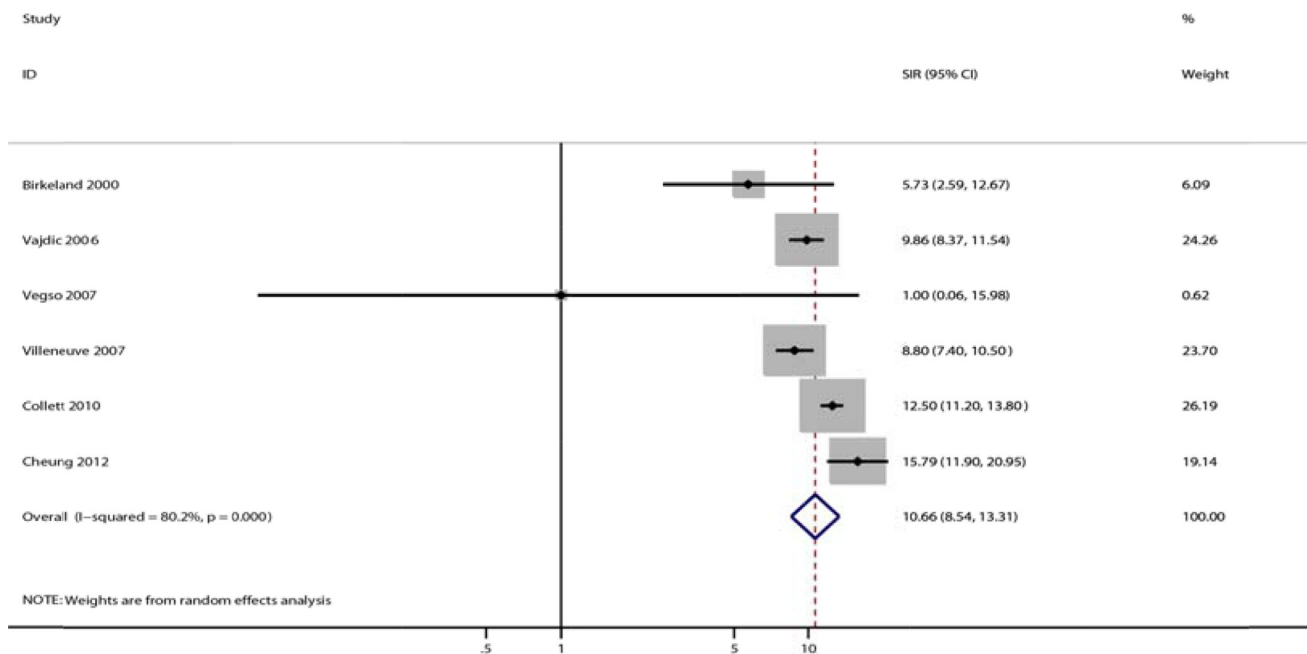

Supplementary Figure 13: Non-Hodgkin lymphoma risk in renal transplant recipients.

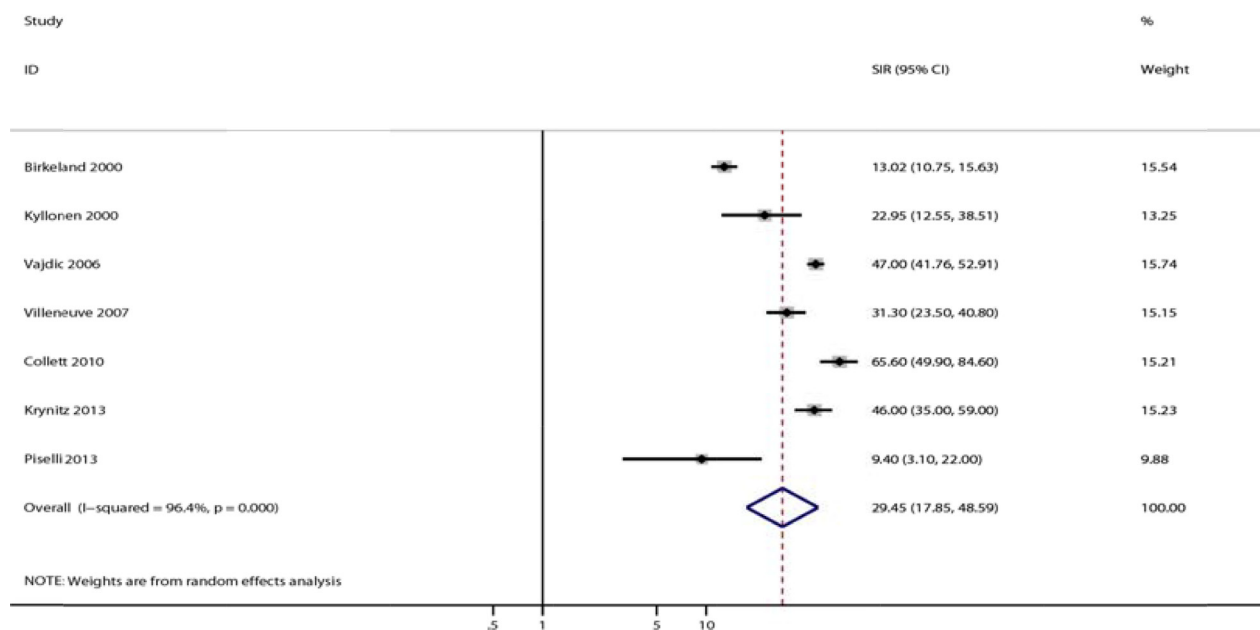

Supplementary Figure 14: Lip cancer risk in renal transplant recipients.

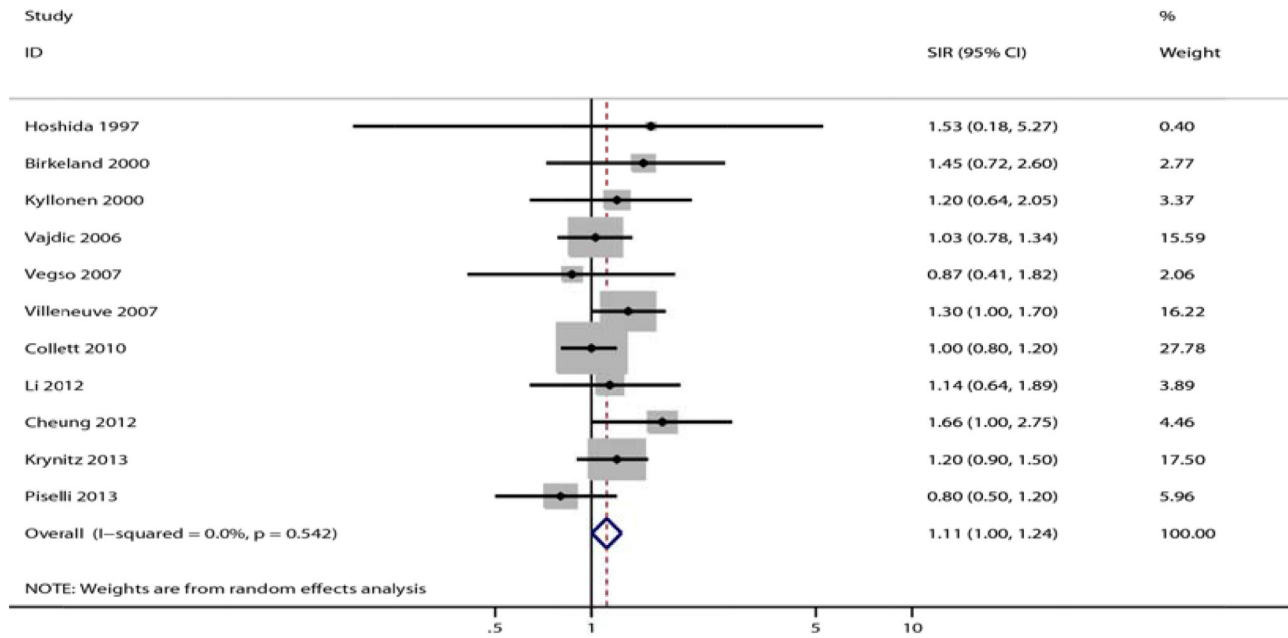

Supplementary Figure 15: Breast cancer risk in renal transplant recipients.

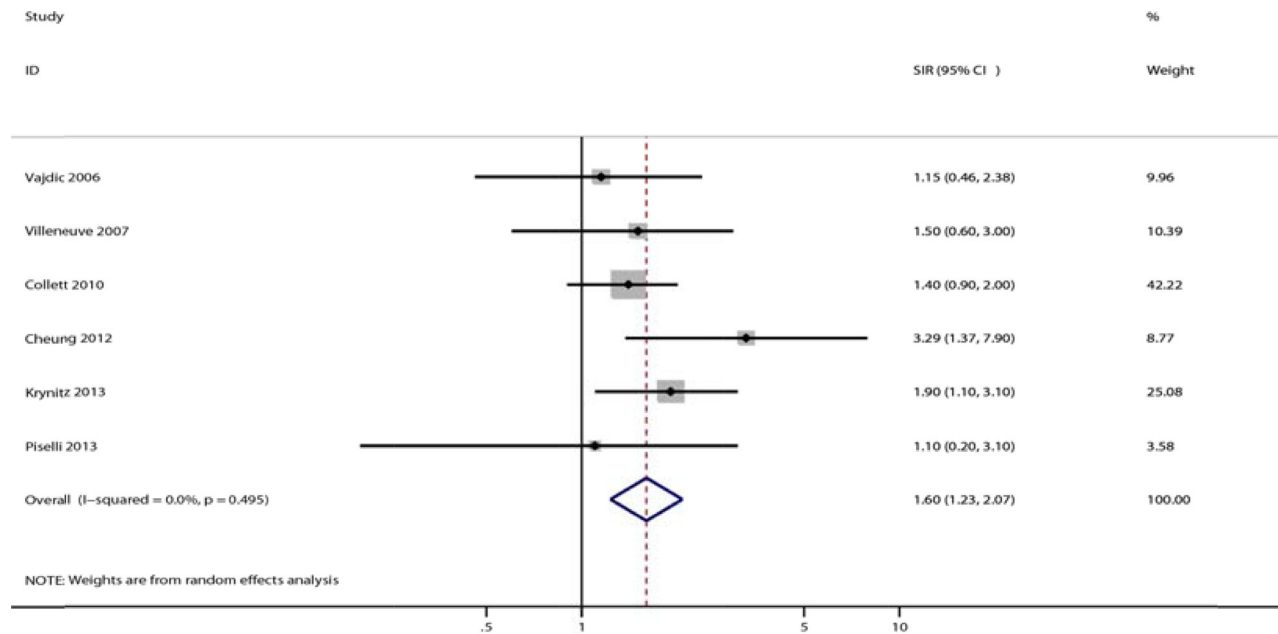

Supplementary Figure 16: Ovarian cancer risk in renal transplant recipients.



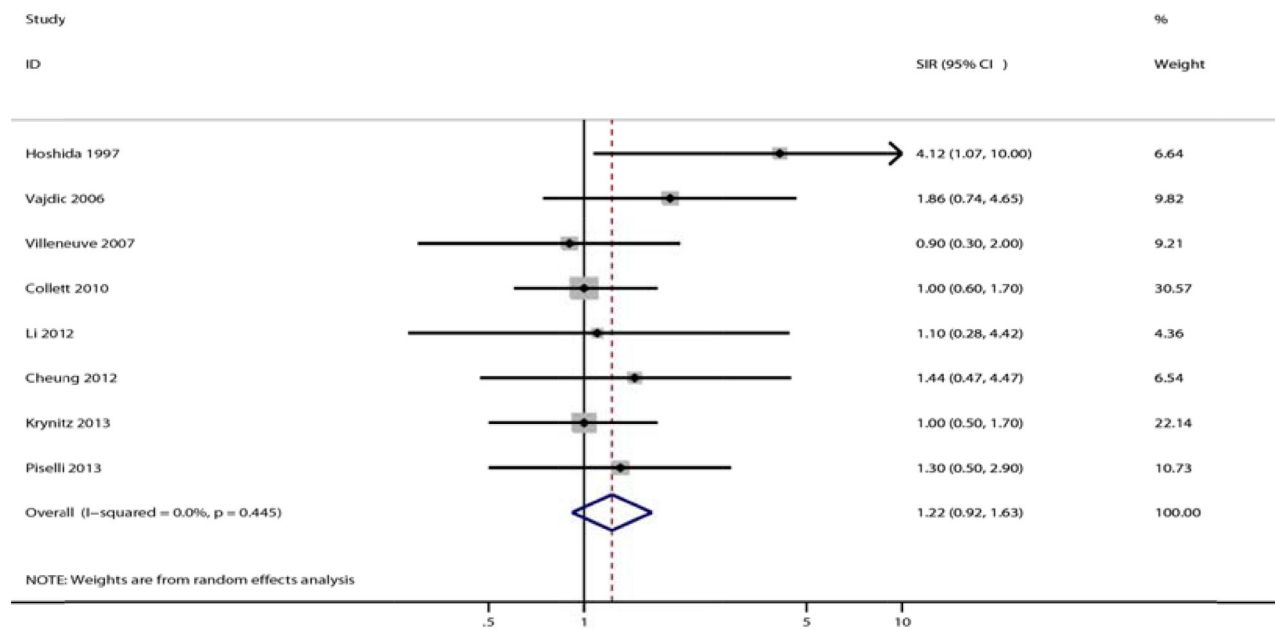

Supplementary Figure 17: Uterus cancer risk in renal transplant recipients.

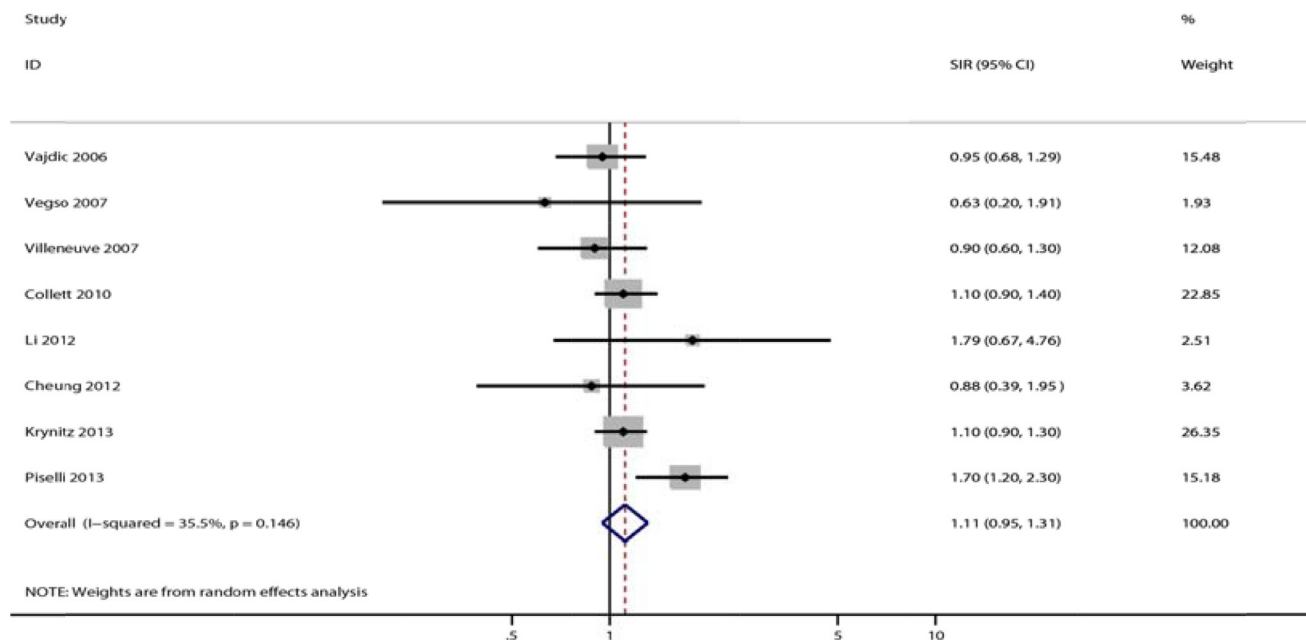

Supplementary Figure 18: Prostate cancer risk in renal transplant recipients.

## Supplementary 2

**Supplementary Table 1: The details of sensitivity analysis for all cancers**

| Excluding study | SIR and 95% CI   | <i>P</i> value | Heterogeneity (%) | <i>P</i> value for heterogeneity |
|-----------------|------------------|----------------|-------------------|----------------------------------|
| Hoshida 1997    | 2.90 (2.11–3.98) | < 0.001        | 99.5              | < 0.001                          |
| Birkeland 2000  | 2.83 (2.05–3.90) | < 0.001        | 99.5              | < 0.001                          |
| Kyllonen 2000   | 2.85 (2.06–3.93) | < 0.001        | 99.5              | < 0.001                          |
| Vajdic 2006     | 2.84 (1.99–4.05) | < 0.001        | 99.5              | < 0.001                          |
| Vegso 2007      | 3.11 (2.27–4.25) | < 0.001        | 99.5              | < 0.001                          |
| Villeneuve 2007 | 2.93 (2.11–4.06) | < 0.001        | 99.5              | < 0.001                          |
| Collett 2010    | 2.94 (2.11–4.08) | < 0.001        | 99.3              | < 0.001                          |
| Li 2012         | 2.81 (2.03–3.90) | < 0.001        | 99.5              | < 0.001                          |
| Cheung 2012     | 2.88 (2.08–3.99) | < 0.001        | 99.5              | < 0.001                          |
| Krynitz 2013    | 2.68 (2.27–3.16) | < 0.001        | 97.0              | < 0.001                          |
| Piselli 2013    | 3.05 (2.25–4.13) | < 0.001        | 99.4              | < 0.001                          |

**Supplementary Table 2: The details of sensitivity analysis for gastric cancer**

| Excluding study | SIR and 95% CI   | <i>P</i> value | Heterogeneity (%) | <i>P</i> value for heterogeneity |
|-----------------|------------------|----------------|-------------------|----------------------------------|
| Hoshida 1997    | 1.96 (1.61–2.39) | < 0.001        | 0.0               | 0.751                            |
| Vegso 2007      | 1.93 (1.59–2.34) | < 0.001        | 0.0               | 0.680                            |
| Villeneuve 2007 | 1.91 (1.55–2.34) | < 0.001        | 0.0               | 0.695                            |
| Collett 2010    | 1.89 (1.49–2.41) | < 0.001        | 0.0               | 0.690                            |
| Li 2012         | 1.94 (1.59–2.36) | < 0.001        | 0.0               | 0.682                            |
| Cheung 2012     | 1.84 (1.50–2.25) | < 0.001        | 0.0               | 0.926                            |
| Krynitz 2013    | 1.95 (1.59–2.40) | < 0.001        | 0.0               | 0.691                            |
| Piselli 2013    | 2.03 (1.65–2.49) | < 0.001        | 0.0               | 0.887                            |

**Supplementary Table 3: The details of sensitivity analysis for colon cancer**

| Excluding study | SIR and 95% CI   | <i>P</i> value | Heterogeneity (%) | <i>P</i> value for heterogeneity |
|-----------------|------------------|----------------|-------------------|----------------------------------|
| Kyllonen 2000   | 1.76 (1.49–2.07) | < 0.001        | 56.4              | 0.032                            |
| Vajdic 2006     | 1.87 (1.48–2.38) | < 0.001        | 70.2              | 0.003                            |
| Vegso 2007      | 1.89 (1.61–2.22) | < 0.001        | 57.2              | 0.029                            |
| Villeneuve 2007 | 1.94 (1.58–2.37) | < 0.001        | 65.0              | 0.009                            |
| Collett 2010    | 1.85 (1.43–2.40) | < 0.001        | 70.8              | 0.002                            |
| Li 2012         | 1.83 (1.49–2.25) | < 0.001        | 70.7              | 0.002                            |
| Cheung 2012     | 1.86 (1.50–2.31) | < 0.001        | 70.8              | 0.002                            |
| Krynitz 2013    | 1.76 (1.43–2.17) | < 0.001        | 63.4              | 0.012                            |

**Supplementary Table 4: The details of sensitivity analysis for pancreatic cancer**

| Excluding study | SIR and 95% CI   | <i>P</i> value | Heterogeneity (%) | <i>P</i> value for heterogeneity |
|-----------------|------------------|----------------|-------------------|----------------------------------|
| Villeneuve 2007 | 1.57 (1.25–1.97) | < 0.001        | 0.0               | 0.454                            |
| Collett 2010    | 1.56 (1.06–2.28) | 0.024          | 5.3               | 0.377                            |
| Li 2012         | 1.55 (1.24–1.93) | < 0.001        | 0.0               | 0.426                            |
| Cheung 2012     | 1.53 (1.19–1.96) | 0.001          | 6.6               | 0.369                            |
| Krynitz 2013    | 1.40 (1.09–1.79) | 0.008          | 0.0               | 0.786                            |
| Piselli 2013    | 1.58 (1.26–1.98) | < 0.001        | 0.0               | 0.557                            |

**Supplementary Table 5: The details of sensitivity analysis for hepatocellular carcinoma**

| Excluding study | SIR and 95% CI   | <i>P</i> value | Heterogeneity (%) | <i>P</i> value for heterogeneity |
|-----------------|------------------|----------------|-------------------|----------------------------------|
| Hoshida 1997    | 2.54 (1.68–3.85) | < 0.001        | 75.4              | < 0.001                          |
| Vajdic 2006     | 2.32 (1.47–3.66) | < 0.001        | 76.9              | < 0.001                          |
| Vegso 2007      | 2.40 (1.58–3.64) | < 0.001        | 76.9              | < 0.001                          |
| Villeneuve 2007 | 2.51 (1.64–3.85) | < 0.001        | 75.7              | < 0.001                          |
| Collett 2010    | 2.41 (1.52–3.84) | < 0.001        | 75.1              | < 0.001                          |
| Li 2012         | 2.24 (1.63–3.07) | < 0.001        | 35.2              | 0.147                            |
| Cheung 2012     | 2.38 (1.48–3.82) | < 0.001        | 75.4              | < 0.001                          |
| Krynitz 2013    | 2.35 (1.46–3.78) | < 0.001        | 76.2              | < 0.001                          |
| Piselli 2013    | 2.89 (2.07–4.03) | < 0.001        | 61.2              | 0.012                            |

**Supplementary Table 6: The details of sensitivity analysis for lung cancer**

| Excluding study | SIR and 95% CI   | <i>P</i> value | Heterogeneity (%) | <i>P</i> value for heterogeneity |
|-----------------|------------------|----------------|-------------------|----------------------------------|
| Vegso 2007      | 1.78 (1.36–2.32) | < 0.001        | 83.3              | < 0.001                          |
| Villeneuve 2007 | 1.60 (1.18–2.17) | 0.003          | 79.7              | < 0.001                          |
| Collett 2010    | 1.75 (1.25–2.44) | 0.001          | 81.3              | < 0.001                          |
| Li 2012         | 1.51 (1.21–1.89) | < 0.001        | 74.0              | 0.002                            |
| Cheung 2012     | 1.68 (1.24–2.28) | 0.001          | 85.2              | < 0.001                          |
| Krynitz 2013    | 1.67 (1.21–2.32) | 0.002          | 85.1              | < 0.001                          |
| Piselli 2013    | 1.81 (1.36–2.41) | < 0.001        | 82.5              | < 0.001                          |

**Supplementary Table 7: The details of sensitivity analysis for thyroid cancer**

| Excluding study | SIR and 95% CI   | <i>P</i> value | Heterogeneity (%) | <i>P</i> value for heterogeneity |
|-----------------|------------------|----------------|-------------------|----------------------------------|
| Hoshida 1997    | 4.87 (3.64–6.50) | < 0.001        | 53.8              | 0.021                            |
| Birkeland 2000  | 5.00 (3.73–6.70) | < 0.001        | 56.8              | 0.013                            |
| Kyllonen 2000   | 4.77 (3.52–6.47) | < 0.001        | 53.6              | 0.022                            |
| Vajdic 2006     | 4.75 (3.43–6.58) | < 0.001        | 52.5              | 0.026                            |
| Vegso 2007      | 5.03 (3.74–6.77) | < 0.001        | 57.2              | 0.013                            |
| Villeneuve 2007 | 5.01 (3.59–7.01) | < 0.001        | 56.9              | 0.013                            |
| Collett 2010    | 4.74 (3.43–6.54) | < 0.001        | 51.3              | 0.030                            |
| Li 2012         | 5.39 (4.09–7.10) | < 0.001        | 46.6              | 0.051                            |
| Cheung 2012     | 5.11 (3.73–7.02) | < 0.001        | 55.9              | 0.015                            |
| Krynitz 2013    | 5.15 (3.77–7.04) | < 0.001        | 55.3              | 0.017                            |
| Piselli 2013    | 5.69 (4.56–7.09) | < 0.001        | 22.5              | 0.236                            |

**Supplementary Table 8: The details of sensitivity analysis for urinary bladder cancer**

| Excluding study | SIR and 95% CI   | <i>P</i> value | Heterogeneity (%) | <i>P</i> value for heterogeneity |
|-----------------|------------------|----------------|-------------------|----------------------------------|
| Hoshida 1997    | 3.36 (1.36–8.27) | 0.009          | 98.2              | < 0.001                          |
| Birkeland 2000  | 3.46 (1.39–8.61) | 0.008          | 98.2              | < 0.001                          |
| Kyllonen 2000   | 3.55 (1.41–8.93) | 0.007          | 98.2              | < 0.001                          |
| Vajdic 2006     | 3.53 (1.32–9.47) | 0.012          | 98.1              | < 0.001                          |
| Vegso 2007      | 3.99 (1.63–9.77) | 0.002          | 98.2              | < 0.001                          |
| Villeneuve 2007 | 3.74 (1.46–9.56) | 0.006          | 98.1              | < 0.001                          |
| Collett 2010    | 3.66 (1.34–9.97) | 0.011          | 98.0              | < 0.001                          |
| Li 2012         | 2.63 (1.89–3.68) | < 0.001        | 78.3              | < 0.001                          |
| Cheung 2012     | 3.22 (1.27–8.18) | 0.014          | 98.2              | < 0.001                          |
| Krynitz 2013    | 3.74 (1.43–9.77) | 0.007          | 98.0              | < 0.001                          |
| Piselli 2013    | 3.99 (1.61–9.89) | 0.003          | 98.0              | < 0.001                          |

**Supplementary Table 9: The details of sensitivity analysis for renal cell cancer**

| Excluding study | SIR and 95% CI     | <i>P</i> value | Heterogeneity (%) | <i>P</i> value for heterogeneity |
|-----------------|--------------------|----------------|-------------------|----------------------------------|
| Hoshida 1997    | 8.83 (5.32–14.67)  | < 0.001        | 96.6              | < 0.001                          |
| Birkeland 2000  | 11.38 (6.61–19.60) | < 0.001        | 97.2              | < 0.001                          |
| Kyllonen 2000   | 11.10 (6.35–19.42) | < 0.001        | 97.2              | < 0.001                          |
| Vajdic 2006     | 11.21 (6.26–20.08) | < 0.001        | 97.1              | < 0.001                          |
| Vegso 2007      | 11.00 (6.42–18.83) | < 0.001        | 97.2              | < 0.001                          |
| Villeneuve 2007 | 11.21 (6.26–20.09) | < 0.001        | 97.1              | < 0.001                          |
| Collett 2010    | 11.10 (5.99–20.58) | < 0.001        | 97.1              | < 0.001                          |
| Li 2012         | 9.16 (6.54–12.83)  | < 0.001        | 90.2              | < 0.001                          |
| Cheung 2012     | 10.59 (6.02–18.63) | < 0.001        | 97.2              | < 0.001                          |
| Krynitz 2013    | 11.42 (6.45–20.21) | < 0.001        | 97.0              | < 0.001                          |
| Piselli 2013    | 11.70 (6.74–20.13) | < 0.001        | 97.0              | < 0.001                          |

**Supplementary Table 10: The details of sensitivity analysis for non-melanoma skin cancer**

| Excluding study | SIR and 95% CI     | <i>P</i> value | Heterogeneity (%) | <i>P</i> value for heterogeneity |
|-----------------|--------------------|----------------|-------------------|----------------------------------|
| Birkeland 2000  | 11.97 (5.92–24.23) | < 0.001        | 99.7              | < 0.001                          |
| Kyllonen 2000   | 9.85 (4.86–19.99)  | < 0.001        | 99.7              | < 0.001                          |
| Vegso 2007      | 15.36 (7.75–30.44) | < 0.001        | 99.7              | < 0.001                          |
| Collett 2010    | 11.07 (4.69–26.16) | < 0.001        | 98.7              | < 0.001                          |
| Li 2012         | 15.04 (7.62–29.71) | < 0.001        | 99.7              | < 0.001                          |
| Cheung 2012     | 13.23 (6.62–26.46) | < 0.001        | 99.7              | < 0.001                          |
| Krynitz 2013    | 10.25 (6.53–16.08) | < 0.001        | 94.9              | < 0.001                          |

**Supplementary Table 11: The details of sensitivity analysis for melanoma**

| Excluding study | SIR and 95% CI   | <i>P</i> value | Heterogeneity (%) | <i>P</i> value for heterogeneity |
|-----------------|------------------|----------------|-------------------|----------------------------------|
| Birkeland 2000  | 2.81 (0.97–8.19) | 0.058          | 55.0              | 0.084                            |
| Vegso 2007      | 2.93 (1.26–6.81) | 0.013          | 43.5              | 0.150                            |
| Li 2012         | 2.19 (0.85–5.67) | 0.105          | 51.0              | 0.106                            |
| Cheung 2012     | 1.79 (1.03–3.12) | 0.040          | 0.0               | 0.494                            |
| Piselli 2013    | 2.89 (0.86–9.72) | 0.087          | 48.2              | 0.122                            |

**Supplementary Table 12: The details of sensitivity analysis for Hodgkin's lymphoma**

| Excluding study | SIR and 95% CI   | <i>P</i> value | Heterogeneity (%) | <i>P</i> value for heterogeneity |
|-----------------|------------------|----------------|-------------------|----------------------------------|
| Birkeland 2000  | 4.57 (2.68–7.79) | < 0.001        | 56.8              | 0.074                            |
| Vajdic 2006     | 5.14 (2.96–8.93) | < 0.001        | 47.7              | 0.125                            |
| Villeneuve 2007 | 5.38 (3.18–9.11) | < 0.001        | 38.2              | 0.183                            |
| Collett 2010    | 3.71 (2.32–5.92) | < 0.001        | 0.0               | 0.693                            |
| Piselli 2013    | 5.41 (3.46–8.46) | < 0.001        | 40.0              | 0.172                            |

**Supplementary Table 13: The details of sensitivity analysis for non-Hodgkin lymphoma**

| Excluding study | SIR and 95% CI     | <i>P</i> value | Heterogeneity (%) | <i>P</i> value for heterogeneity |
|-----------------|--------------------|----------------|-------------------|----------------------------------|
| Birkeland 2000  | 11.10 (8.89–13.86) | < 0.001        | 82.2              | < 0.001                          |
| Vajdic 2006     | 10.74 (7.97–14.48) | < 0.001        | 81.9              | < 0.001                          |
| Vegso 2007      | 10.83 (8.75–13.42) | < 0.001        | 82.1              | < 0.001                          |
| Villeneuve 2007 | 11.35 (8.88–14.51) | < 0.001        | 75.4              | 0.003                            |
| Collett 2010    | 9.99 (7.49–13.32)  | < 0.001        | 75.9              | 0.002                            |
| Cheung 2012     | 9.77 (7.74–12.34)  | < 0.001        | 79.2              | 0.001                            |

**Supplementary Table 14: The details of sensitivity analysis for lip cancer**

| Excluding study | SIR and 95% CI      | <i>P</i> value | Heterogeneity (%) | <i>P</i> value for heterogeneity |
|-----------------|---------------------|----------------|-------------------|----------------------------------|
| Birkeland 2000  | 38.06 (28.42–50.98) | < 0.001        | 83.5              | < 0.001                          |
| Kyllonen 2000   | 30.55 (17.70–52.72) | < 0.001        | 97.0              | < 0.001                          |
| Vajdic 2006     | 26.67 (14.29–49.77) | < 0.001        | 96.0              | < 0.001                          |
| Villeneuve 2007 | 28.89 (16.03–52.05) | < 0.001        | 97.0              | < 0.001                          |
| Collett 2010    | 25.46 (14.63–44.31) | < 0.001        | 96.5              | < 0.001                          |
| Krynitz 2013    | 26.97 (14.97–48.60) | < 0.001        | 96.9              | < 0.001                          |
| Piselli 2013    | 33.38 (19.82–56.21) | < 0.001        | 96.9              | < 0.001                          |

**Supplementary Table 15: The details of sensitivity analysis for breast cancer**

| Excluding study | SIR and 95% CI   | <i>P</i> value | Heterogeneity (%) | <i>P</i> value for heterogeneity |
|-----------------|------------------|----------------|-------------------|----------------------------------|
| Hoshida 1997    | 1.11 (1.00–1.24) | 0.049          | 0.0               | 0.459                            |
| Birkeland 2000  | 1.11 (0.99–1.23) | 0.067          | 0.0               | 0.510                            |
| Kyllonen 2000   | 1.11 (1.00–1.24) | 0.055          | 0.0               | 0.452                            |
| Vajdic 2006     | 1.13 (1.01–1.27) | 0.038          | 0.0               | 0.484                            |
| Vegso 2007      | 1.12 (1.01–1.25) | 0.039          | 0.0               | 0.488                            |
| Villeneuve 2007 | 1.08 (0.96–1.22) | 0.185          | 0.0               | 0.599                            |
| Collett 2010    | 1.16 (1.03–1.32) | 0.019          | 0.0               | 0.599                            |
| Li 2012         | 1.11 (1.00–1.24) | 0.052          | 0.0               | 0.447                            |
| Cheung 2012     | 1.09 (0.98–1.22) | 0.106          | 0.0               | 0.698                            |
| Krynitz 2013    | 1.10 (0.98–1.23) | 0.121          | 0.0               | 0.483                            |
| Piselli 2013    | 1.14 (1.02–1.27) | 0.021          | 0.0               | 0.684                            |

**Supplementary Table 16: The details of sensitivity analysis for ovarian cancer**

| Excluding study | SIR and 95% CI   | <i>P</i> value | Heterogeneity (%) | <i>P</i> value for heterogeneity |
|-----------------|------------------|----------------|-------------------|----------------------------------|
| Vajdic 2006     | 1.65 (1.26–2.17) | < 0.001        | 0.0               | 0.447                            |
| Villeneuve 2007 | 1.62 (1.20–2.17) | 0.001          | 8.3               | 0.359                            |
| Collett 2010    | 1.75 (1.25–2.47) | 0.001          | 0.0               | 0.452                            |
| Cheung 2012     | 1.49 (1.13–1.95) | 0.004          | 0.0               | 0.825                            |
| Krynitz 2013    | 1.50 (1.11–2.03) | 0.008          | 0.0               | 0.434                            |
| Piselli 2013    | 1.62 (1.24–2.12) | < 0.001        | 2.3               | 0.394                            |

**Supplementary Table 17: The details of sensitivity analysis for uterus cancer**

| Excluding study | SIR and 95% CI   | <i>P</i> value | Heterogeneity (%) | <i>P</i> value for heterogeneity |
|-----------------|------------------|----------------|-------------------|----------------------------------|
| Hoshida 1997    | 1.12 (0.83–1.51) | 0.449          | 0.0               | 0.921                            |
| Vajdic 2006     | 1.17 (0.86–1.58) | 0.314          | 0.0               | 0.427                            |
| Villeneuve 2007 | 1.28 (0.93–1.76) | 0.129          | 6.4               | 0.379                            |
| Collett 2010    | 1.34 (0.95–1.89) | 0.100          | 0.4               | 0.421                            |
| Li 2012         | 1.25 (0.91–1.73) | 0.167          | 12.1              | 0.337                            |
| Cheung 2012     | 1.23 (0.89–1.70) | 0.209          | 11.3              | 0.343                            |
| Krynitz 2013    | 1.31 (0.93–1.84) | 0.120          | 5.0               | 0.389                            |
| Piselli 2013    | 1.24 (0.89–1.74) | 0.207          | 12.2              | 0.337                            |

**Supplementary Table 18: The details of sensitivity analysis for prostate cancer**

| Excluding study | SIR and 95% CI   | <i>P</i> value | Heterogeneity (%) | <i>P</i> value for heterogeneity |
|-----------------|------------------|----------------|-------------------|----------------------------------|
| Vajdic 2006     | 1.15 (0.96–1.38) | 0.142          | 38.5              | 0.136                            |
| Vegso 2007      | 1.13 (0.96–1.33) | 0.152          | 39.1              | 0.131                            |
| Villeneuve 2007 | 1.15 (0.96–1.36) | 0.122          | 37.2              | 0.145                            |
| Collett 2010    | 1.11 (0.90–1.38) | 0.320          | 44.6              | 0.094                            |
| Li 2012         | 1.10 (0.93–1.30) | 0.256          | 39.6              | 0.127                            |
| Cheung 2012     | 1.12 (0.95–1.33) | 0.182          | 42.9              | 0.105                            |
| Krynitz 2013    | 1.11 (0.89–1.39) | 0.339          | 44.5              | 0.094                            |
| Piselli 2013    | 1.05 (0.93–1.19) | 0.397          | 0.0               | 0.743                            |

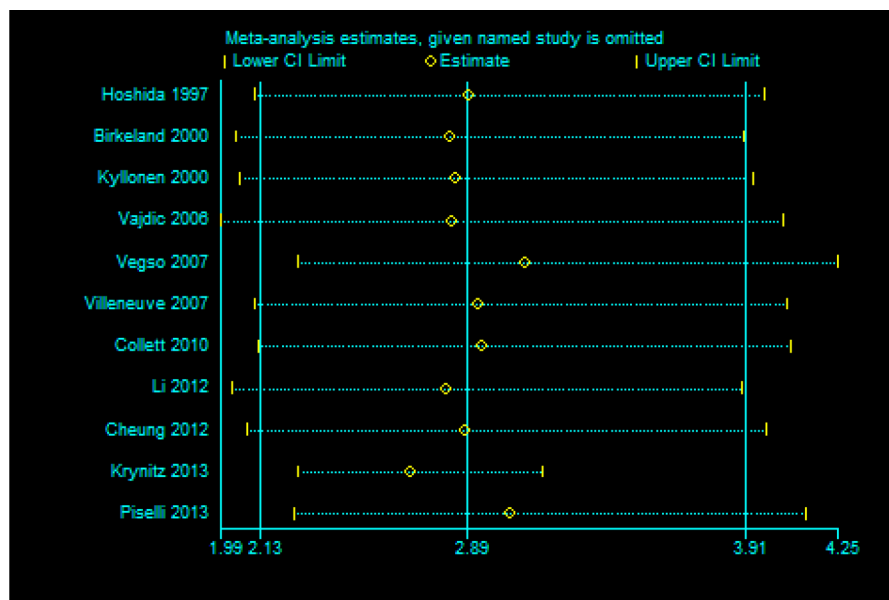

**Supplementary Figure 1: Sensitivity analysis for all cancers.**

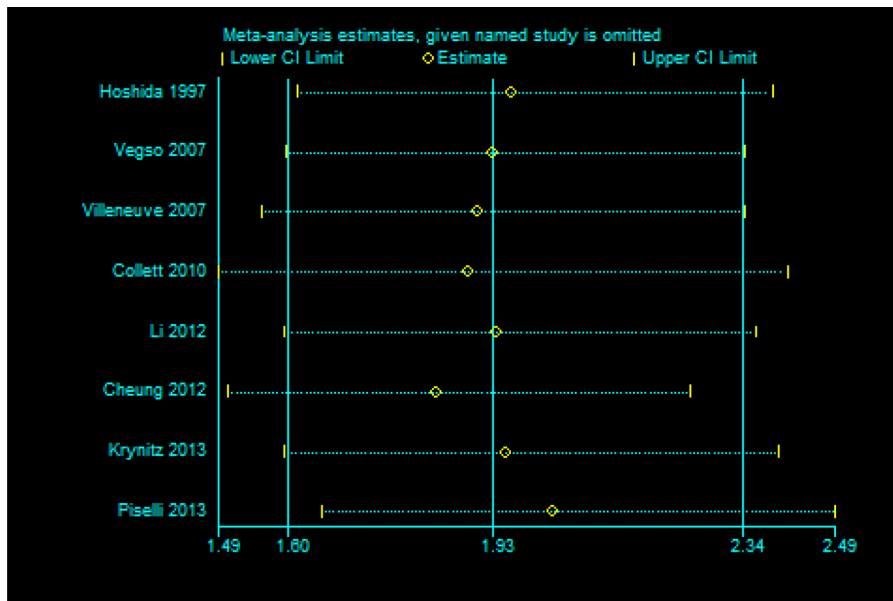

Supplementary Figure 2: Sensitivity analysis for gastric cancer.

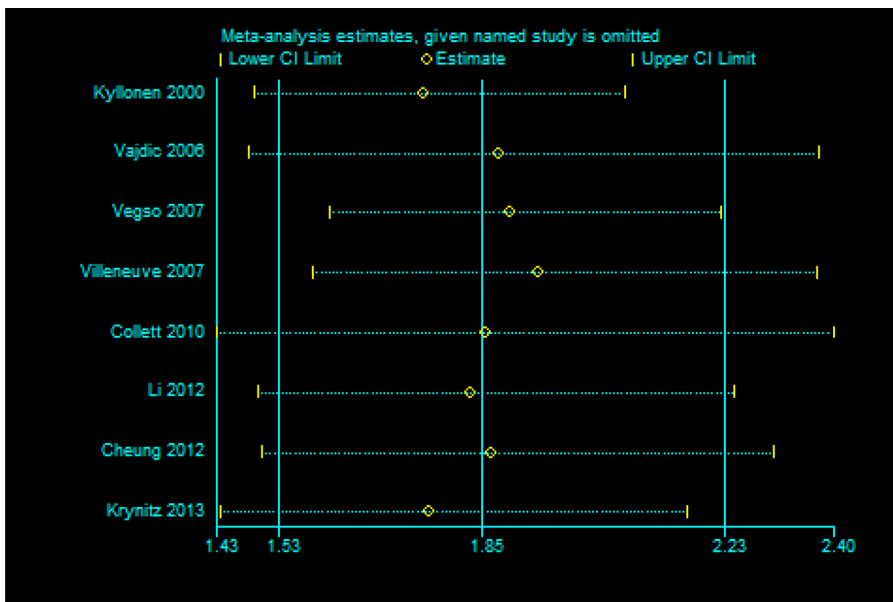

Supplementary Figure 3: Sensitivity analysis for colon cancer.



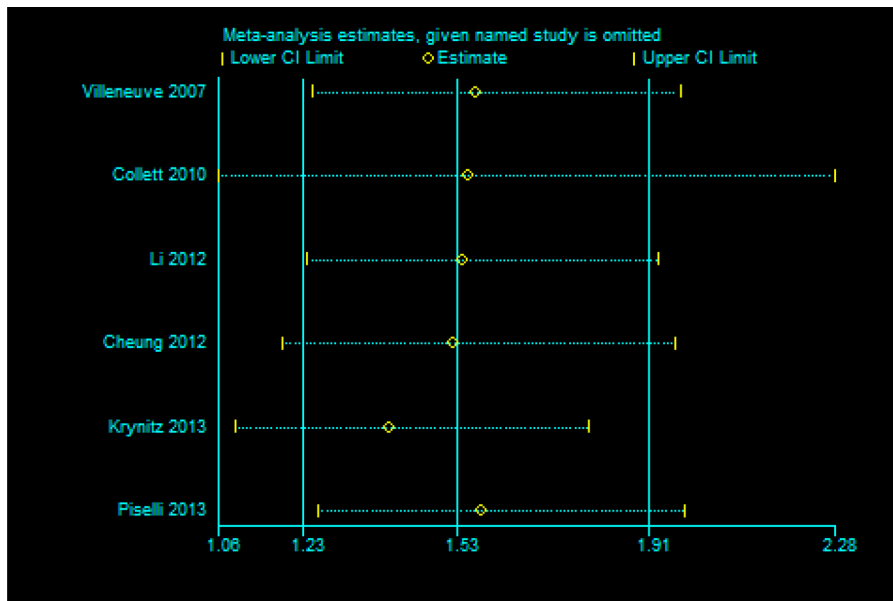

Supplementary Figure 4: Sensitivity analysis for pancreatic cancer.

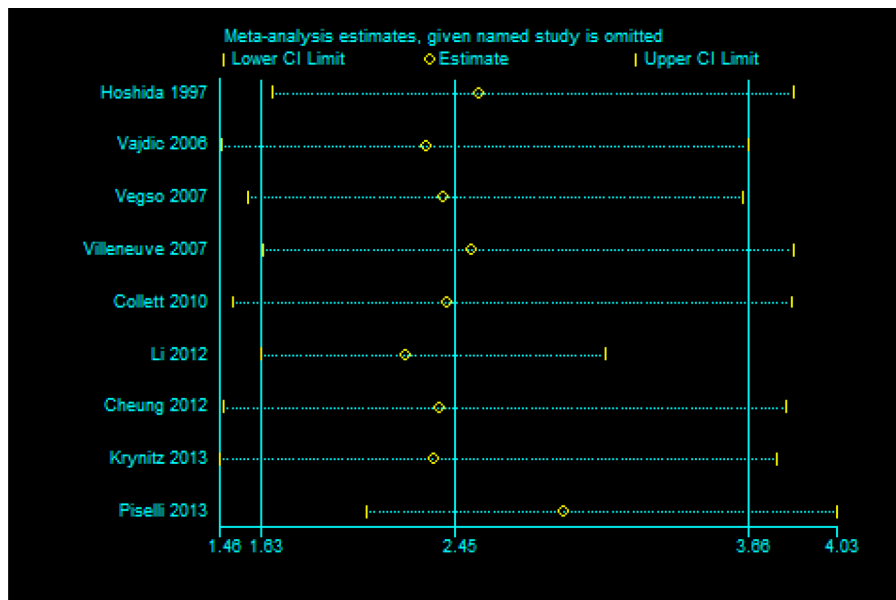

Supplementary Figure 5: Sensitivity analysis for hepatocellular carcinoma.

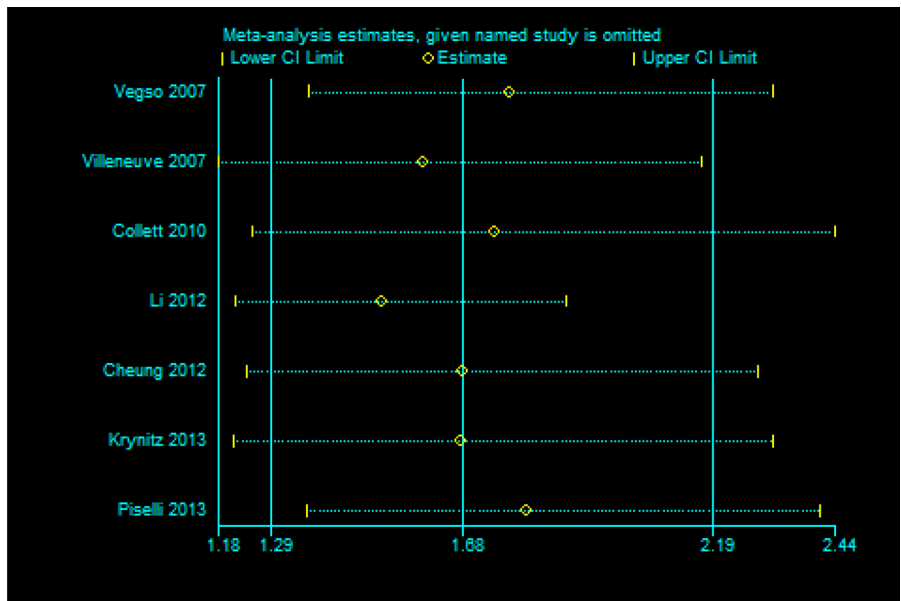

Supplementary Figure 6: Sensitivity analysis for lung cancer.

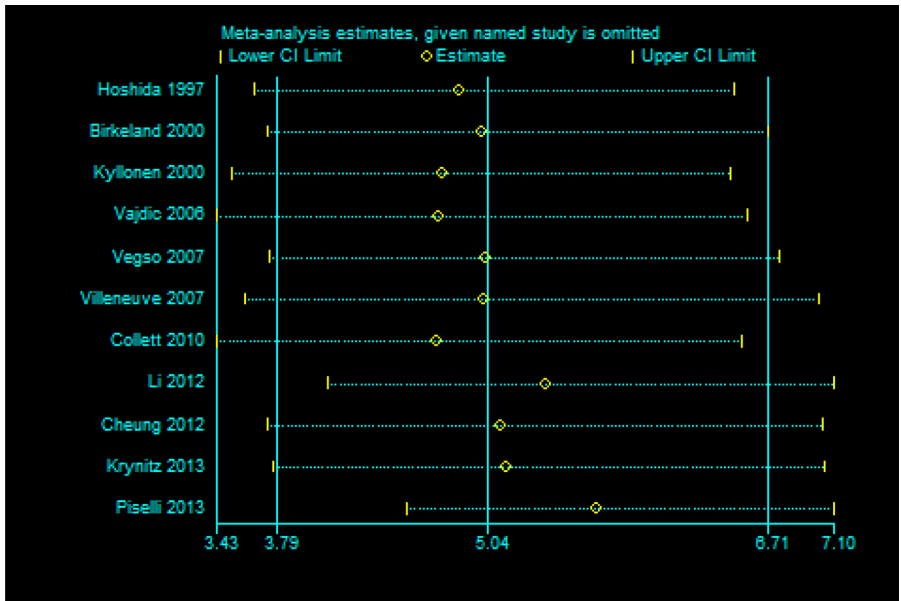

Supplementary Figure 7: Sensitivity analysis for thyroid cancer.

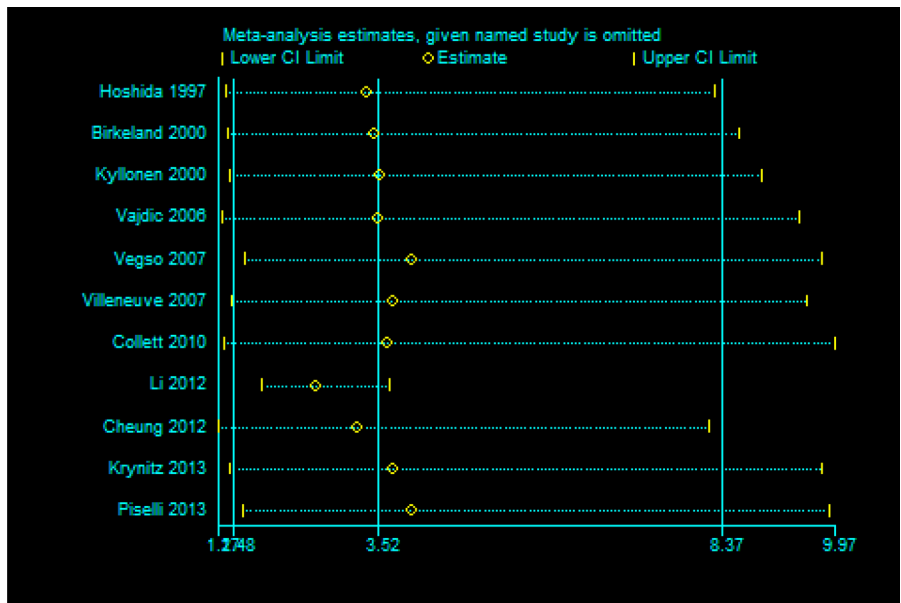

Supplementary Figure 8: Sensitivity analysis for urinary bladder cancer.

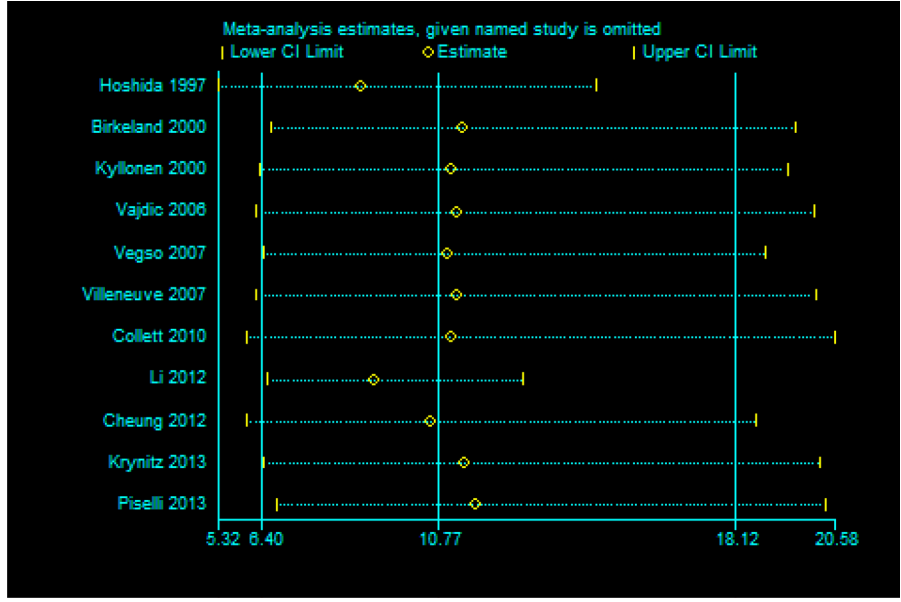

Supplementary Figure 9: Sensitivity analysis for renal cell cancer.

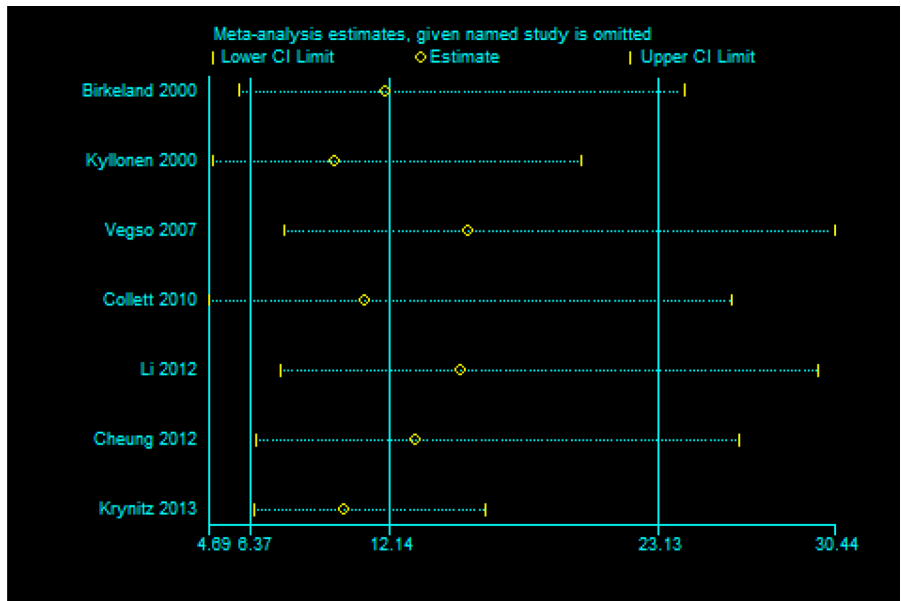

Supplementary Figure 10: Sensitivity analysis for non-melanoma skin cancer.

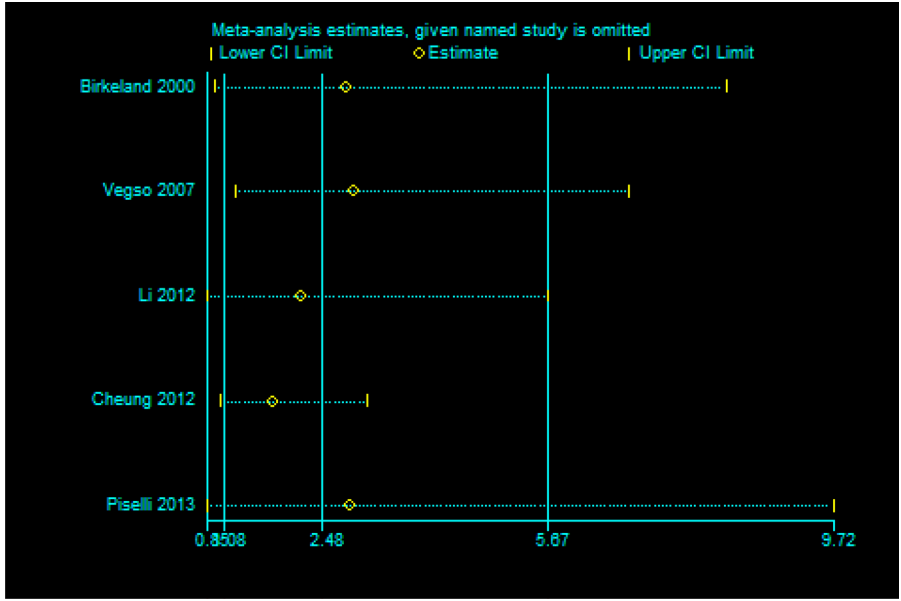

Supplementary Figure 11: Sensitivity analysis for melanoma.

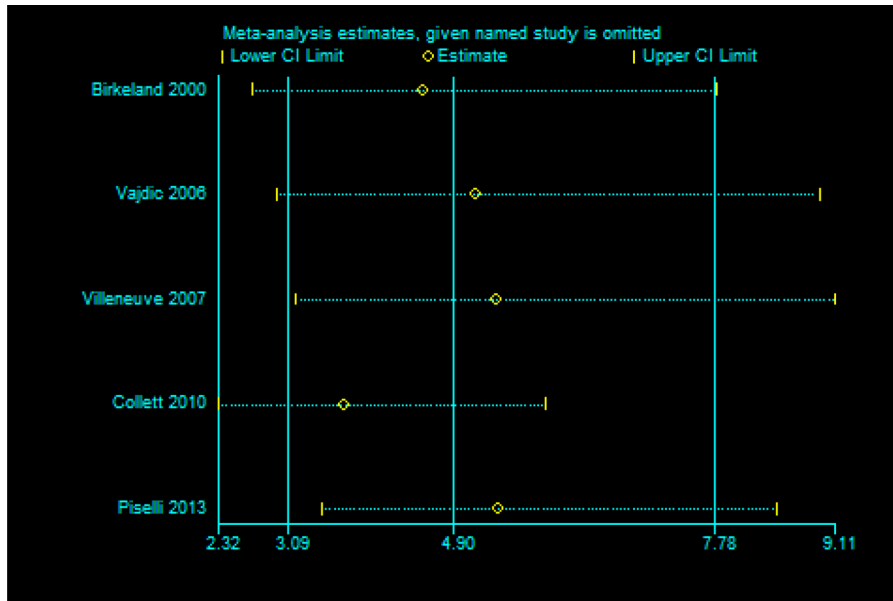

Supplementary Figure 12: Sensitivity analysis for Hodgkin's lymphoma.

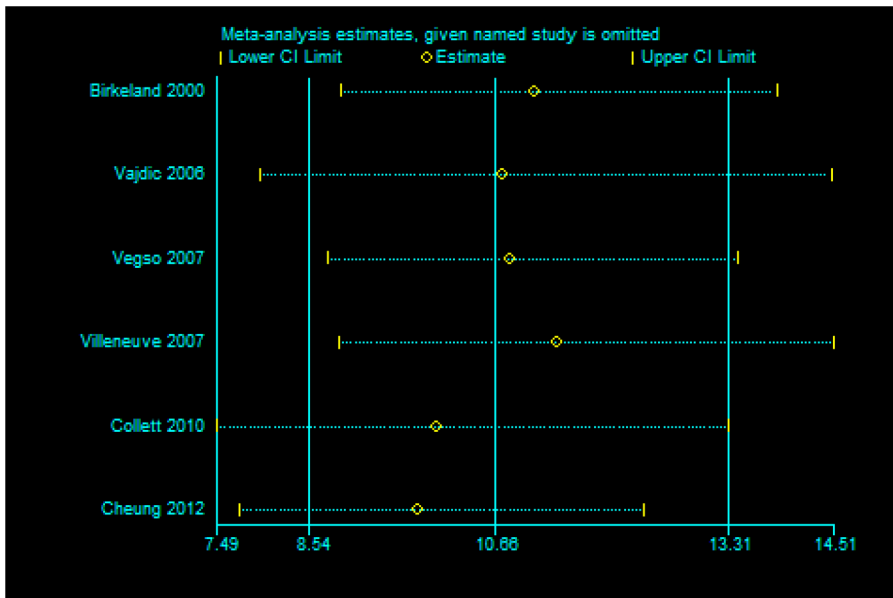

Supplementary Figure 13: Sensitivity analysis for non-Hodgkin lymphoma.

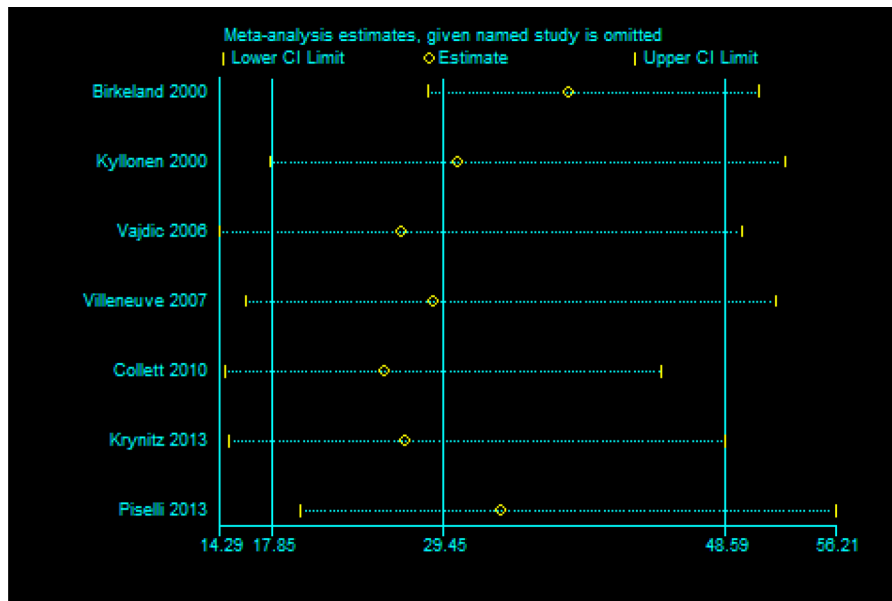

Supplementary Figure 14: Sensitivity analysis for lip cancer.

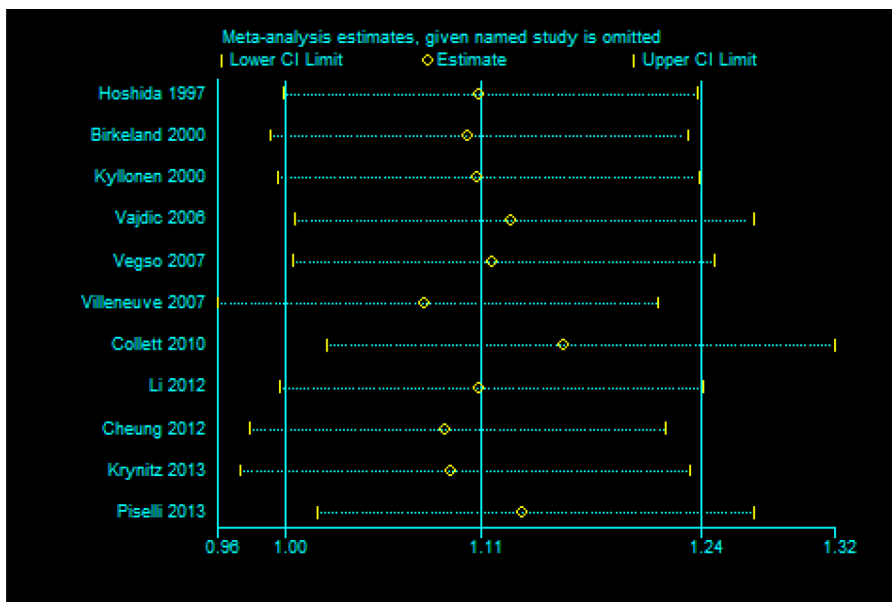

Supplementary Figure 15: Sensitivity analysis for breast cancer.

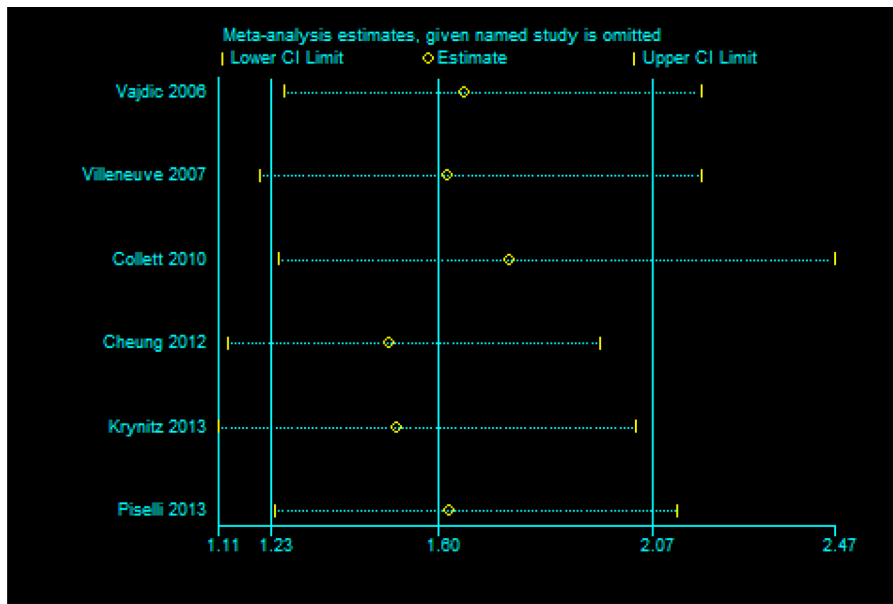

Supplementary Figure 16: Sensitivity analysis for ovarian cancer.

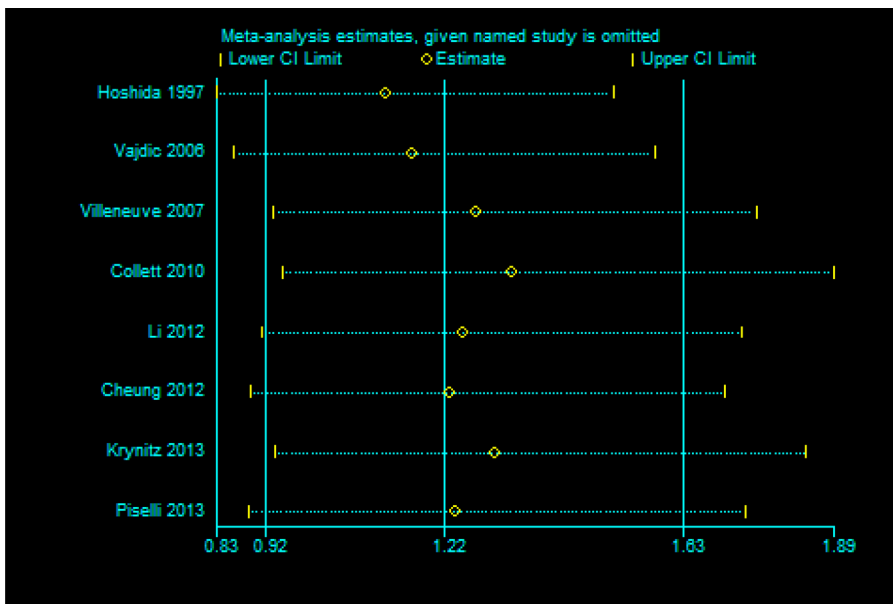

Supplementary Figure 17: Sensitivity analysis for uterus cancer.

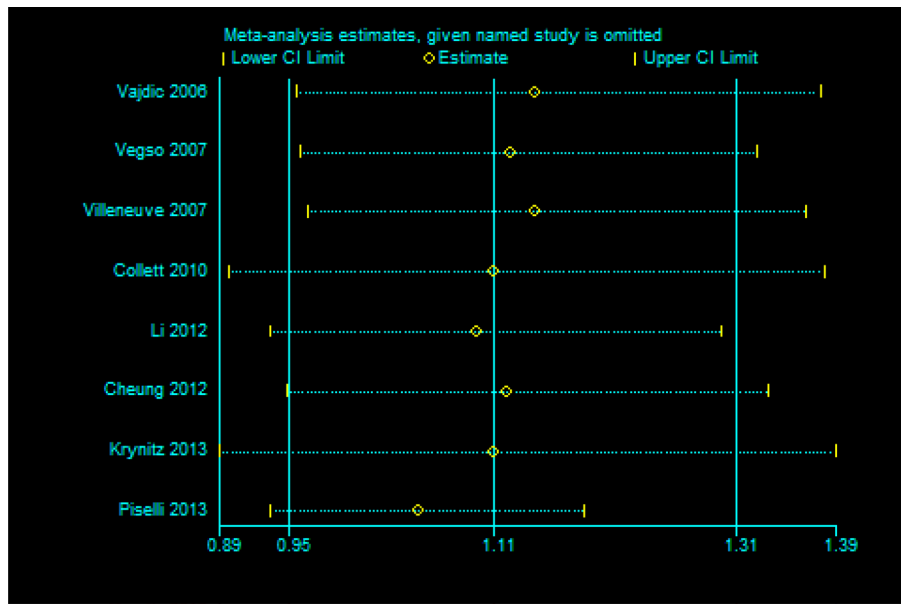

Supplementary Figure 18: Sensitivity analysis for prostate cancer.

### Supplementary 3

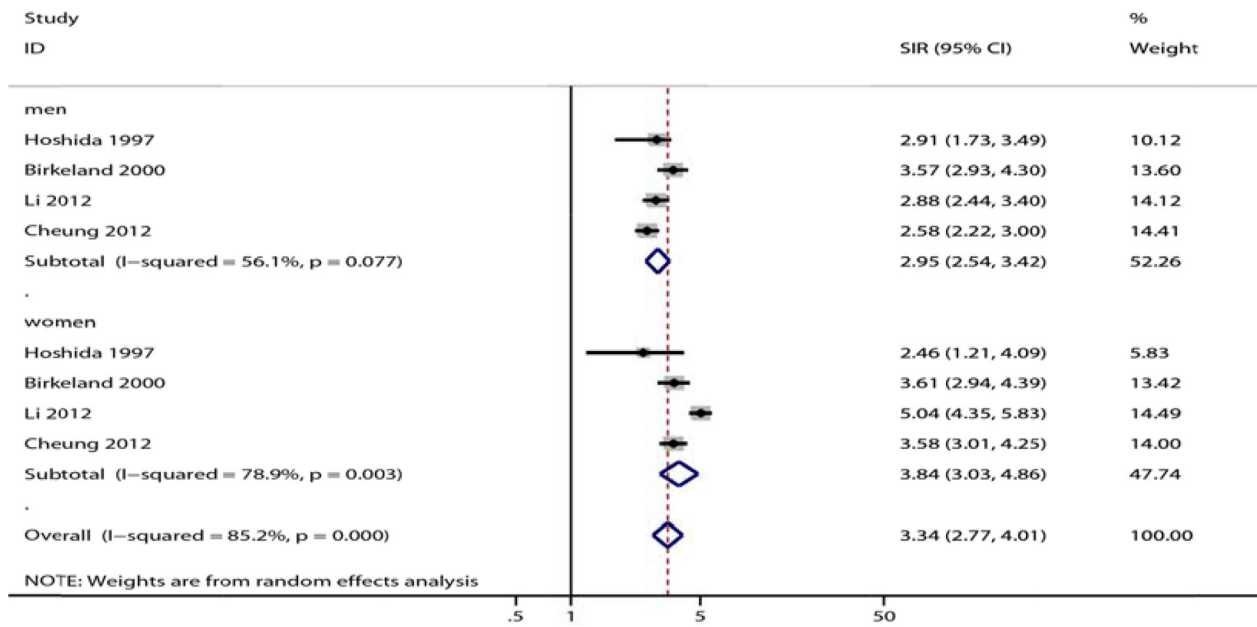

Supplementary Figure 1: All cancer risk in renal transplant recipients in men and women separately.



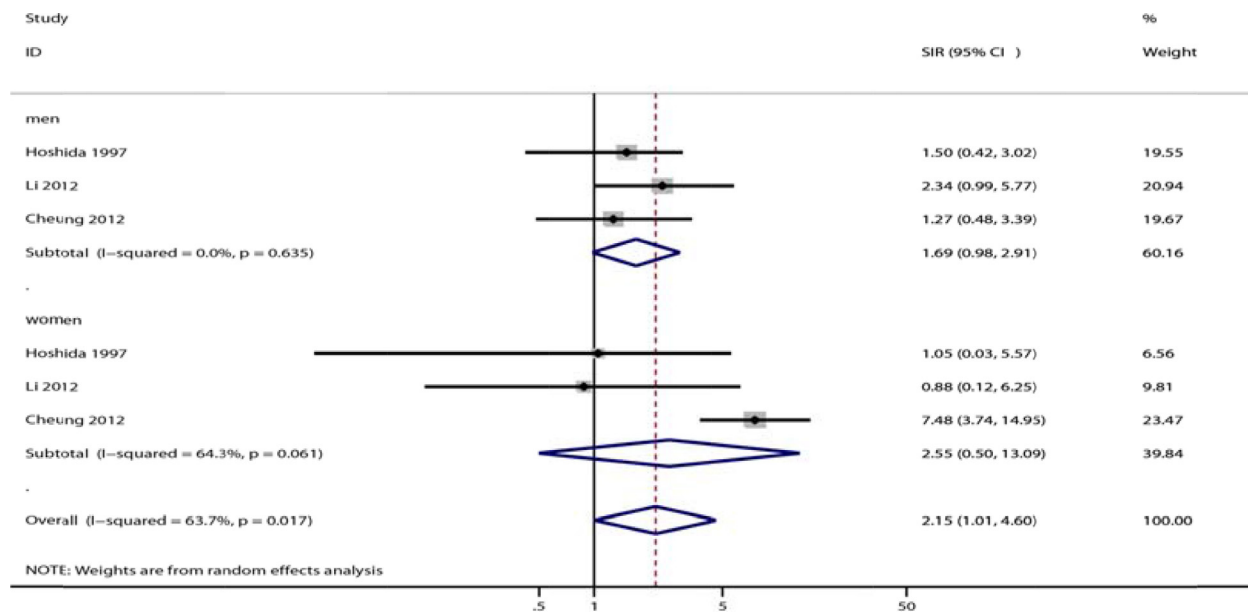

Supplementary Figure 2: Gastric cancer risk in renal transplant recipients in men and women separately.

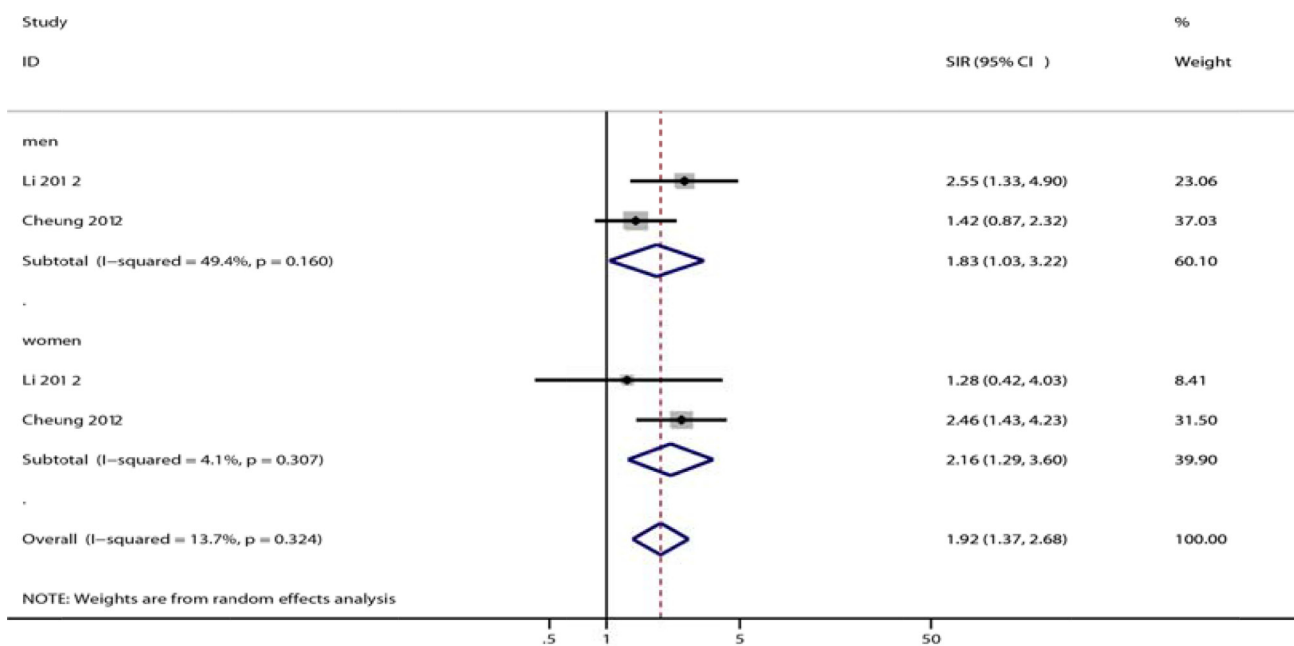

Supplementary Figure 3: Colon cancer risk in renal transplant recipients in men and women separately.

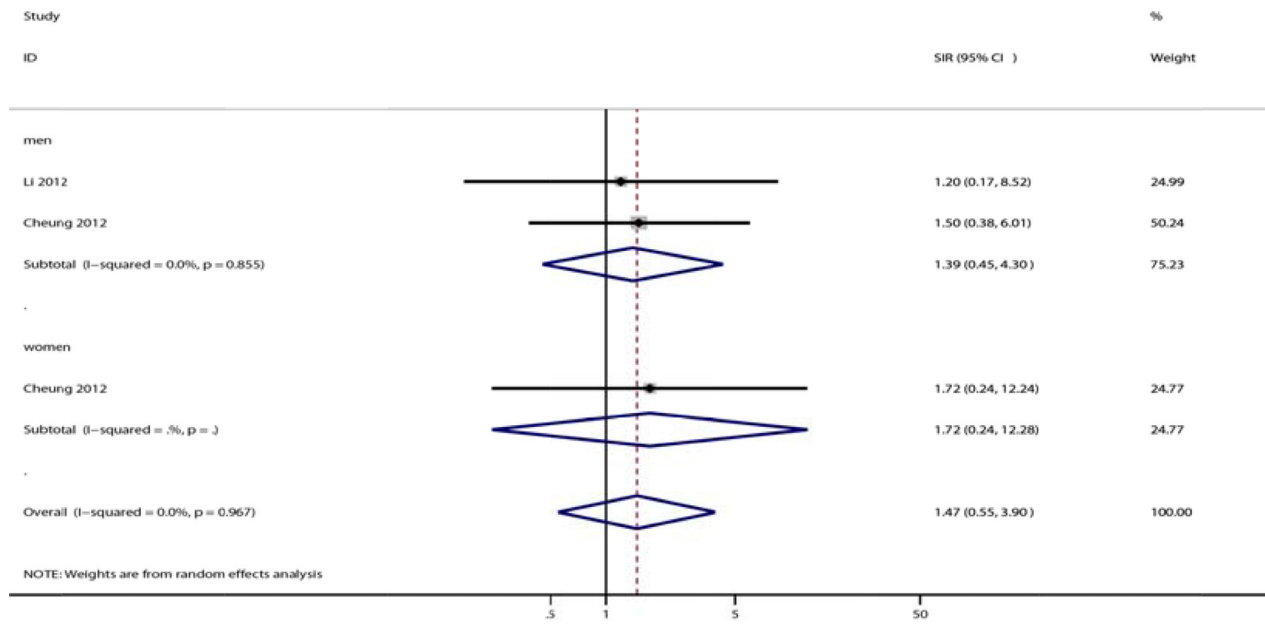

Supplementary Figure 4: Pancreatic cancer risk in renal transplant recipients in men and women separately.

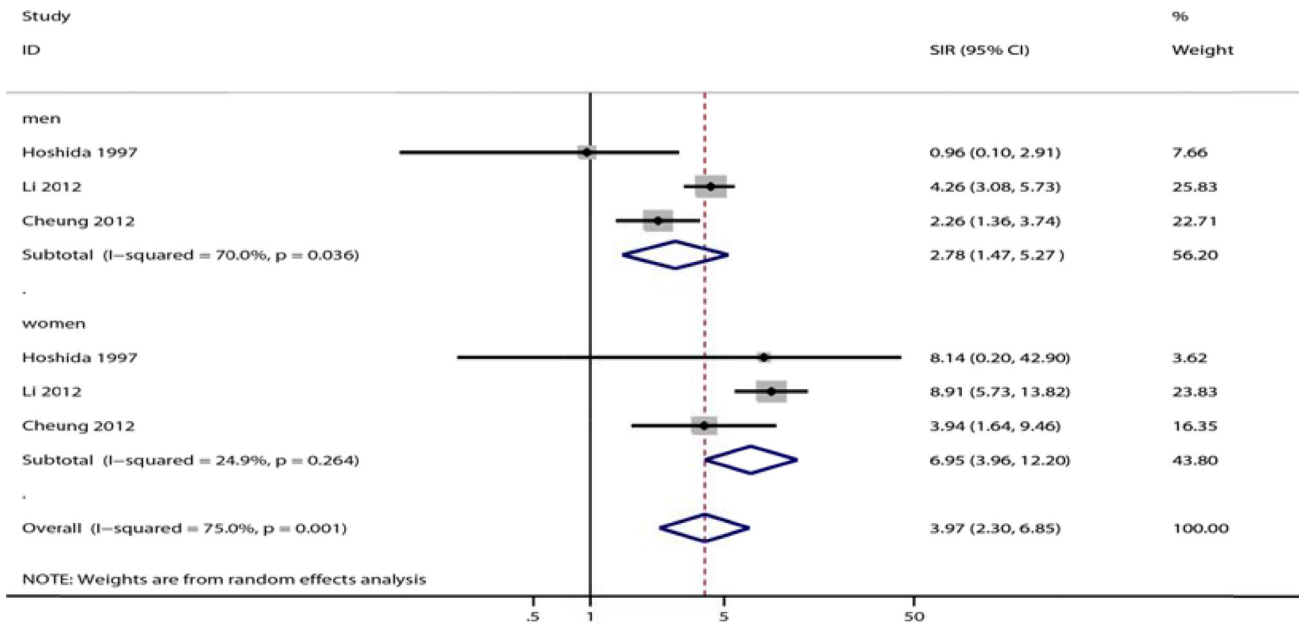

Supplementary Figure 5: Hepatocellular carcinoma risk in renal transplant recipients in men and women separately.

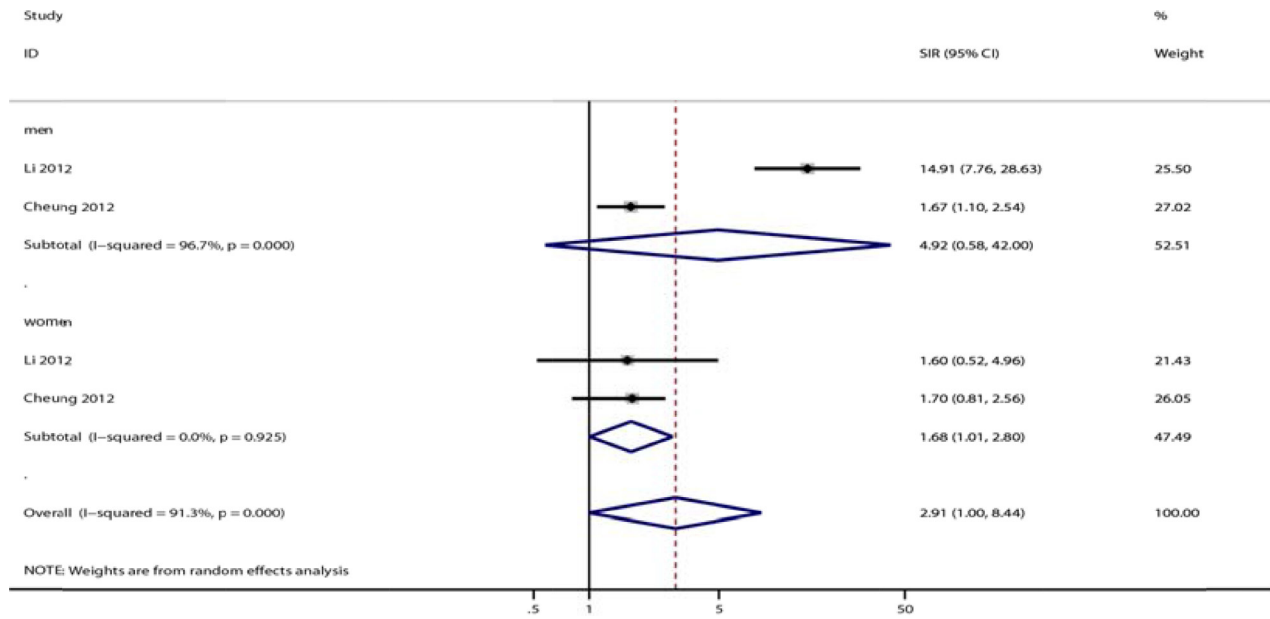

Supplementary Figure 6: Lung cancer risk in renal transplant recipients in men and women separately.

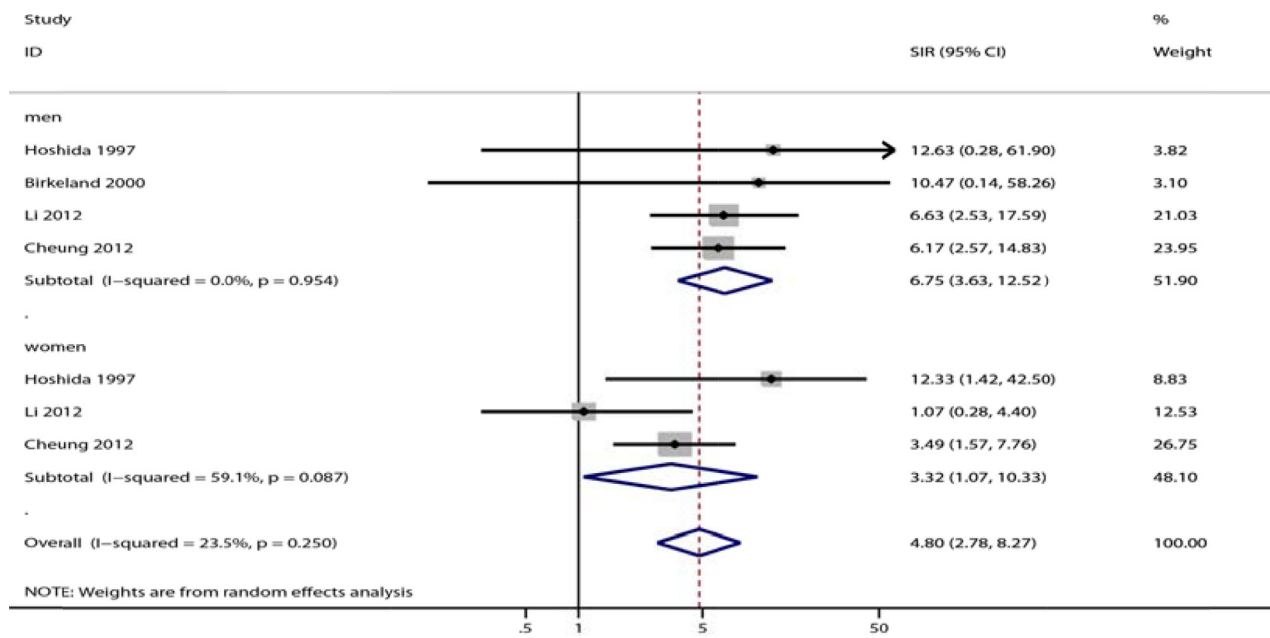

Supplementary Figure 7: Thyroid cancer risk in renal transplant recipients in men and women separately.

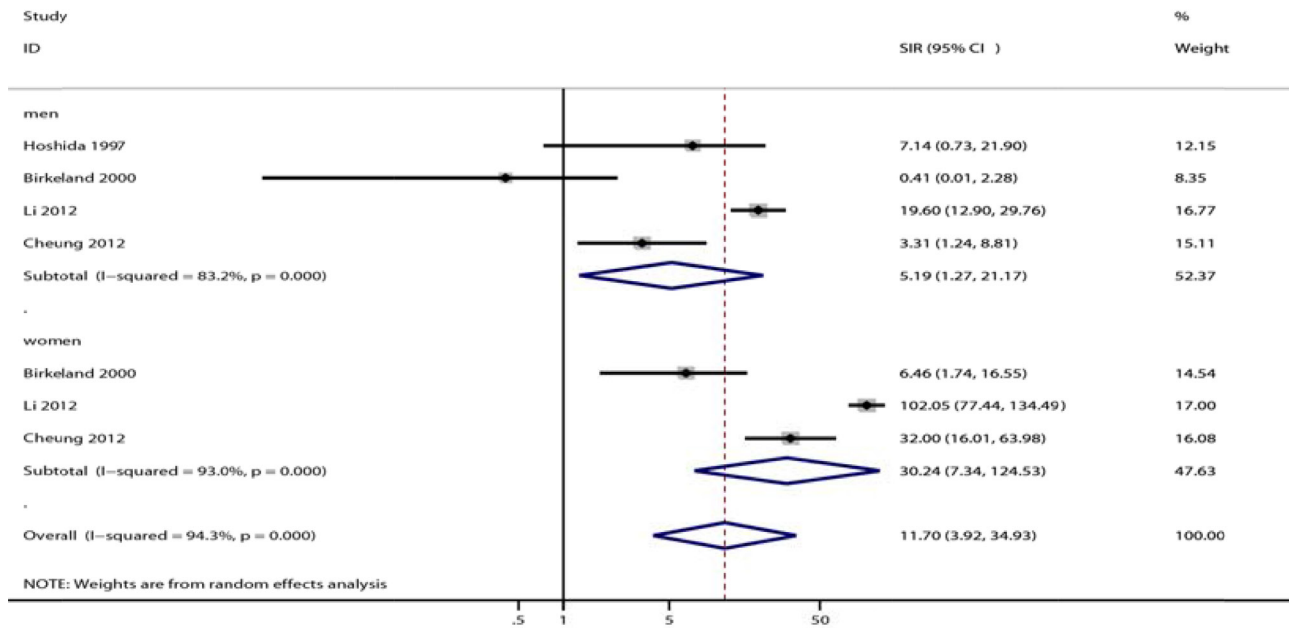

Supplementary Figure 8: Urinary bladder cancer risk in renal transplant recipients in men and women separately.

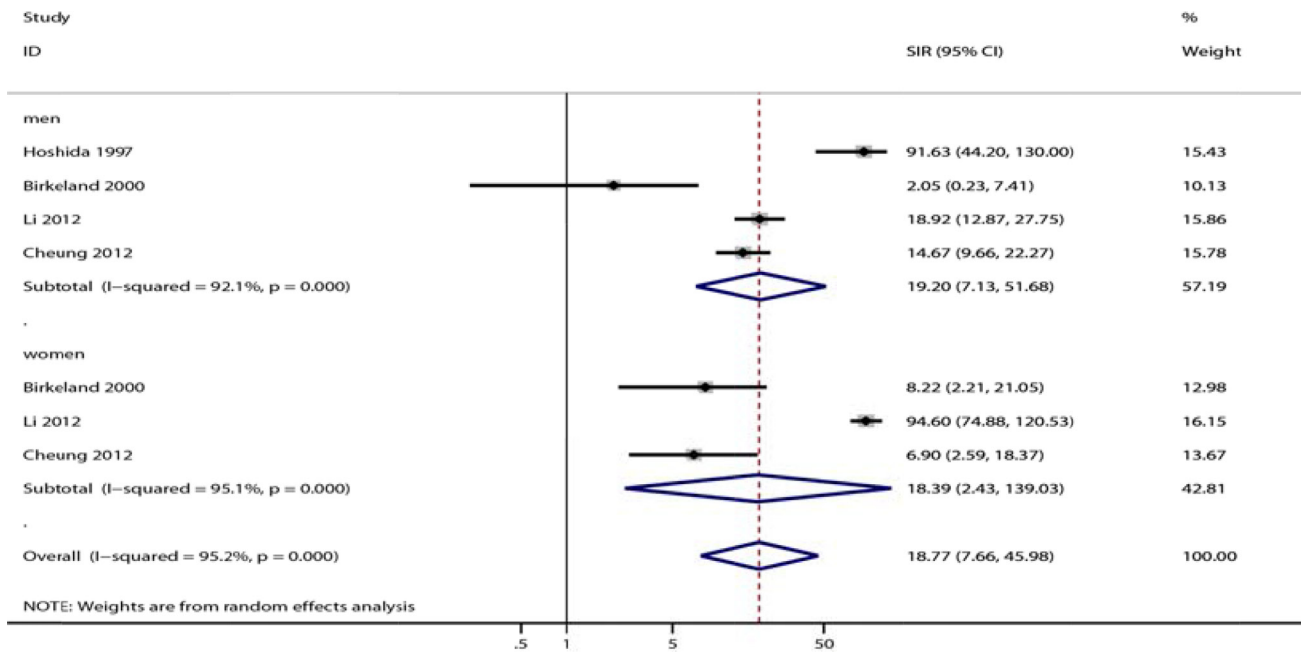

Supplementary Figure 9: Renal cell cancer risk in renal transplant recipients in men and women separately.

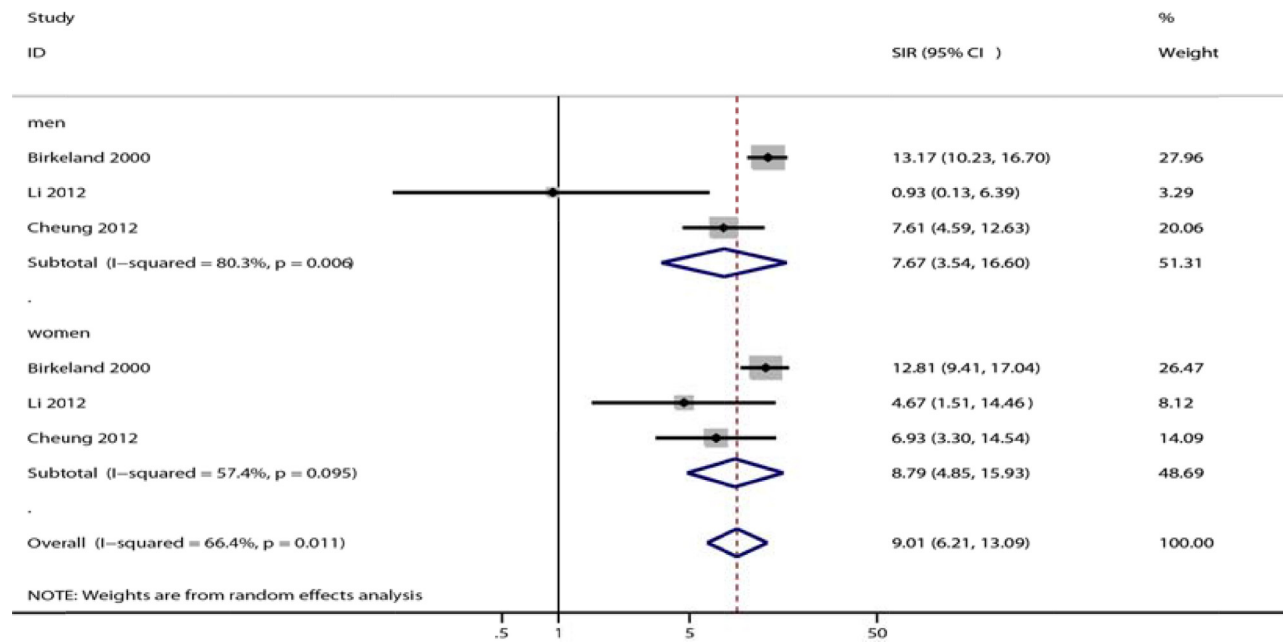

Supplementary Figure 10: Non-melanoma skin cancer risk in renal transplant recipients in men and women separately.

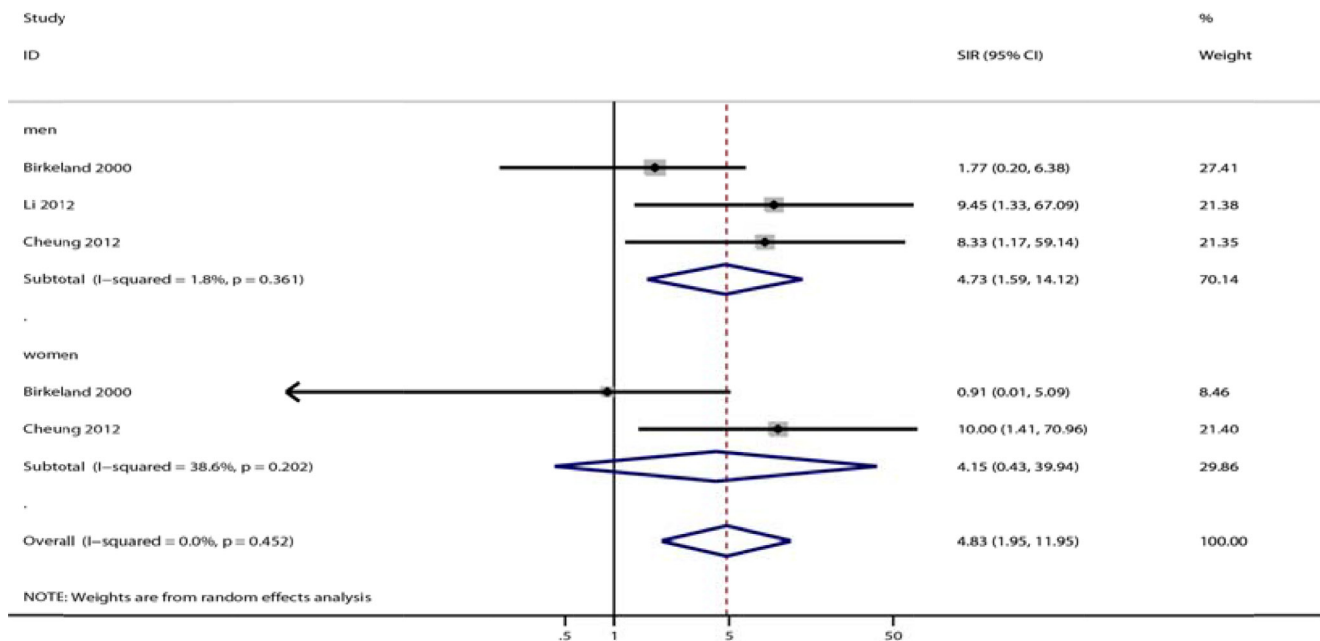

Supplementary Figure 11: Melanoma risk in renal transplant recipients in men and women separately.

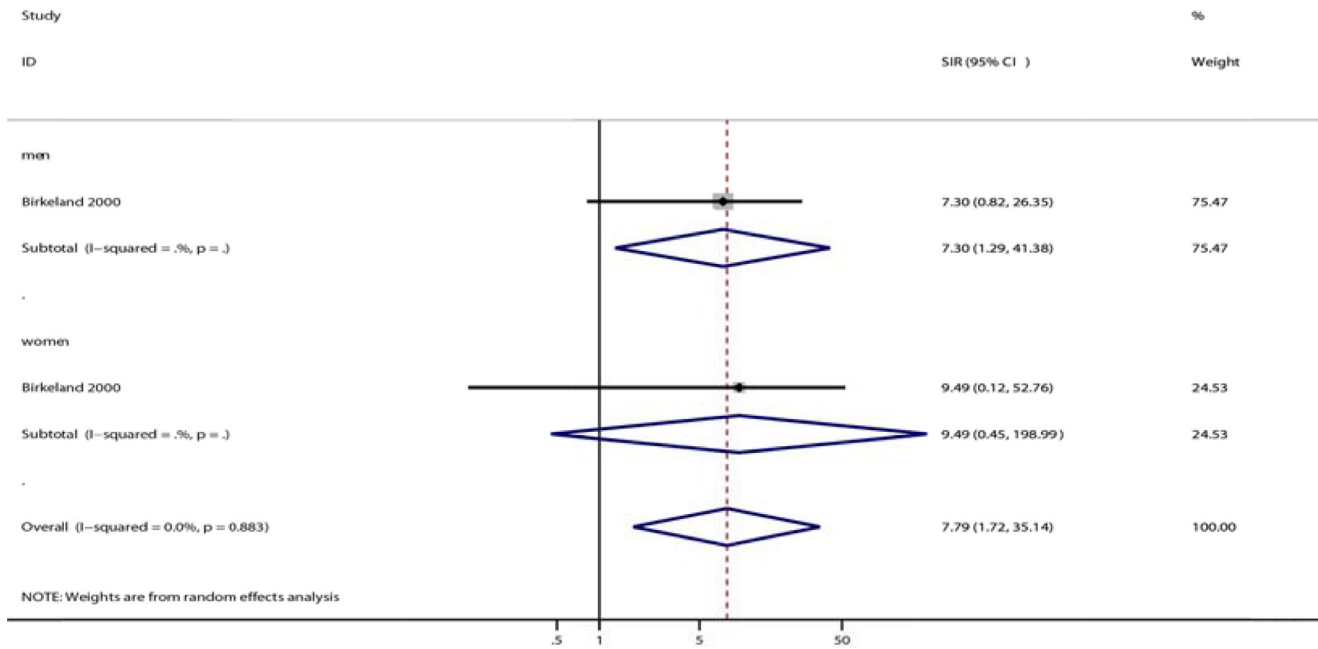

Supplementary Figure 12: Hodgkin's lymphoma risk in renal transplant recipients in men and women separately.

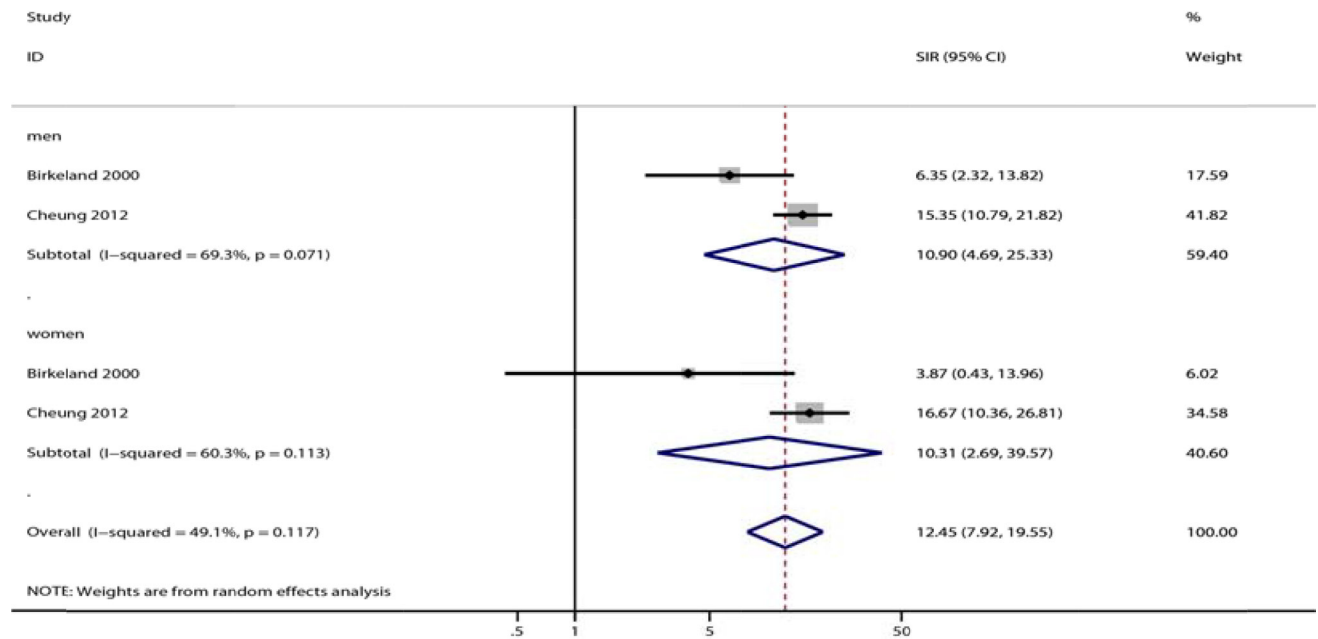

Supplementary Figure 13: Non-Hodgkin lymphoma risk in renal transplant recipients in men and women separately.

Supplementary 4

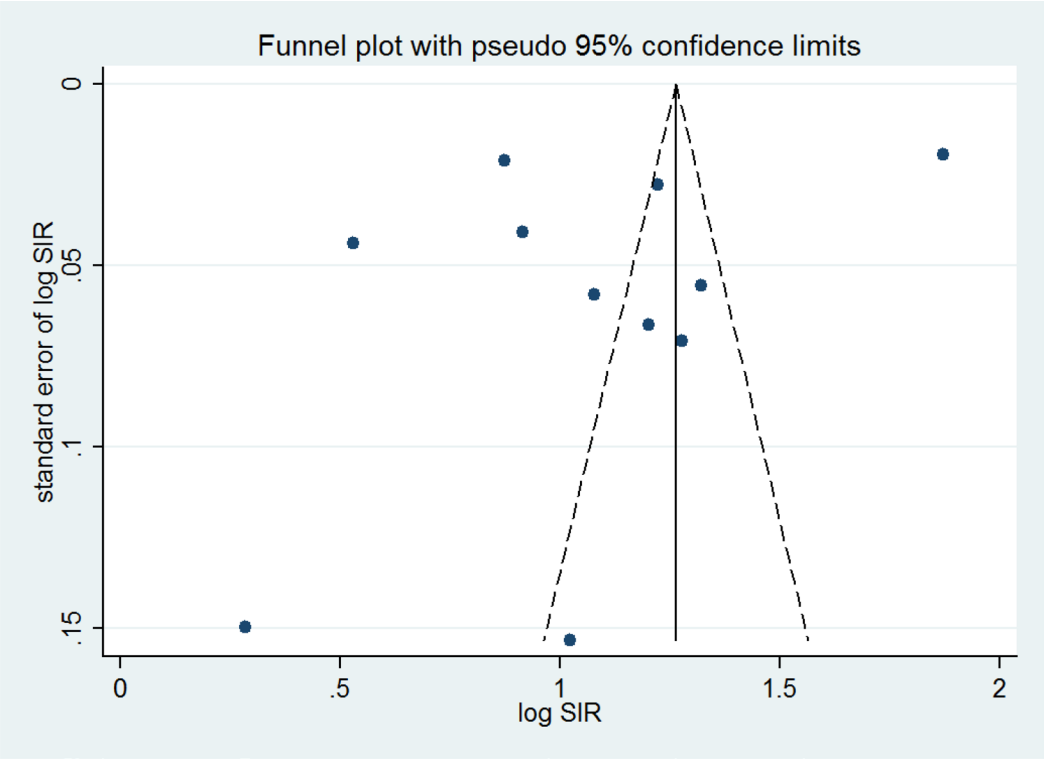

Supplementary Figure 1: NFunnel plot for all cancer (*P* value for Egger: 0.300; *P* value for Begg: 0.876).

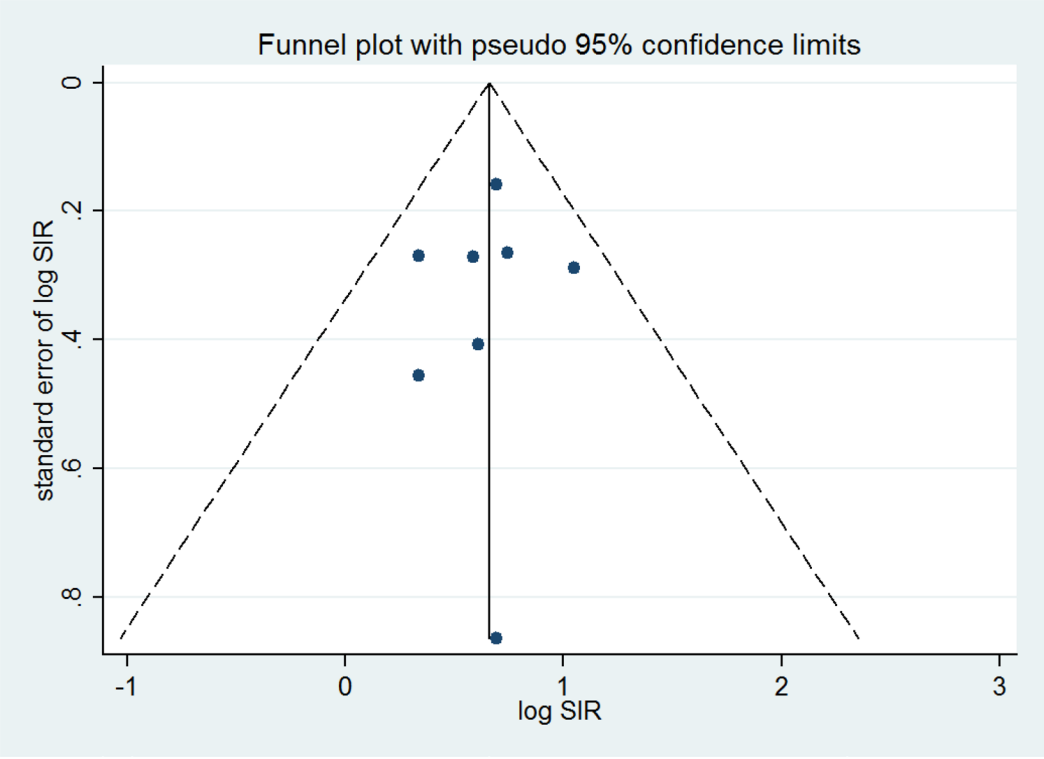

Supplementary Figure 2: Funnel plot for gastric cancer (*P* value for Egger: 0.690; *P* value for Begg: 0.902).

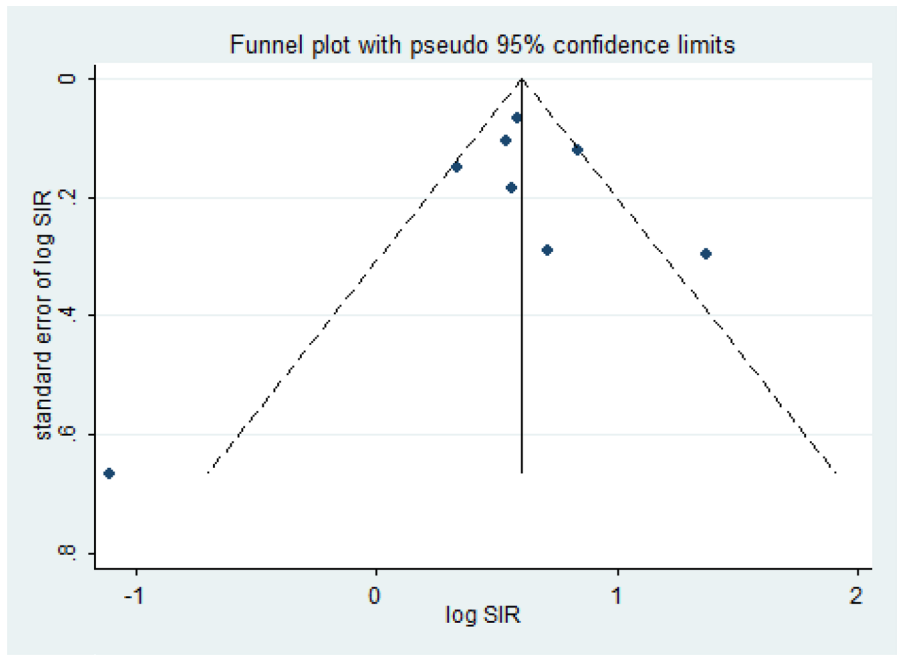

Supplementary Figure 3: Funnel plot for colon cancer (*P* value for Egger: 0.853; *P* value for Begg: 0.902).

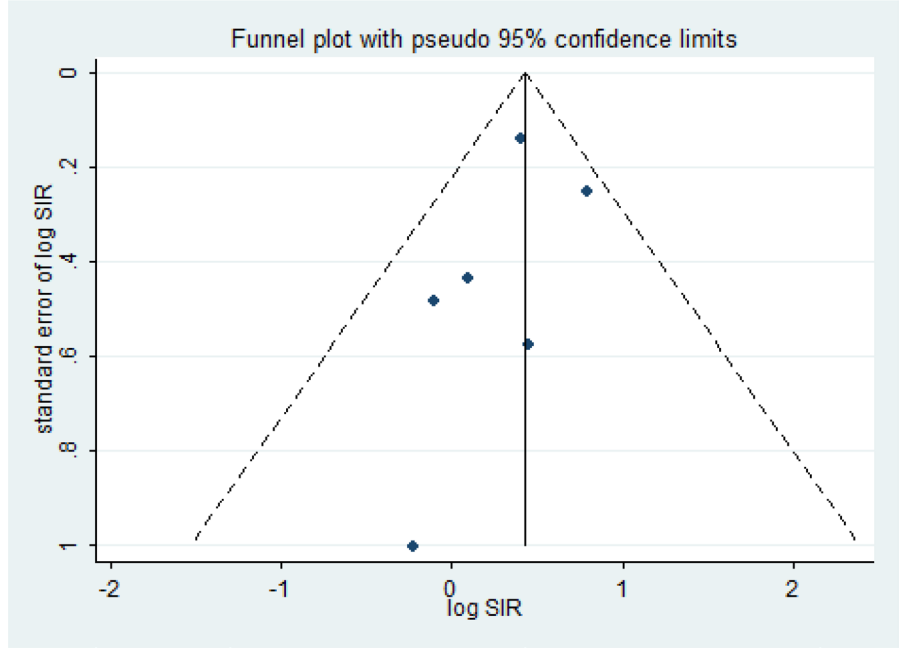

Supplementary Figure 4: Funnel plot for pancreatic cancer (*P* value for Egger: 0.401; *P* value for Begg: 0.707).



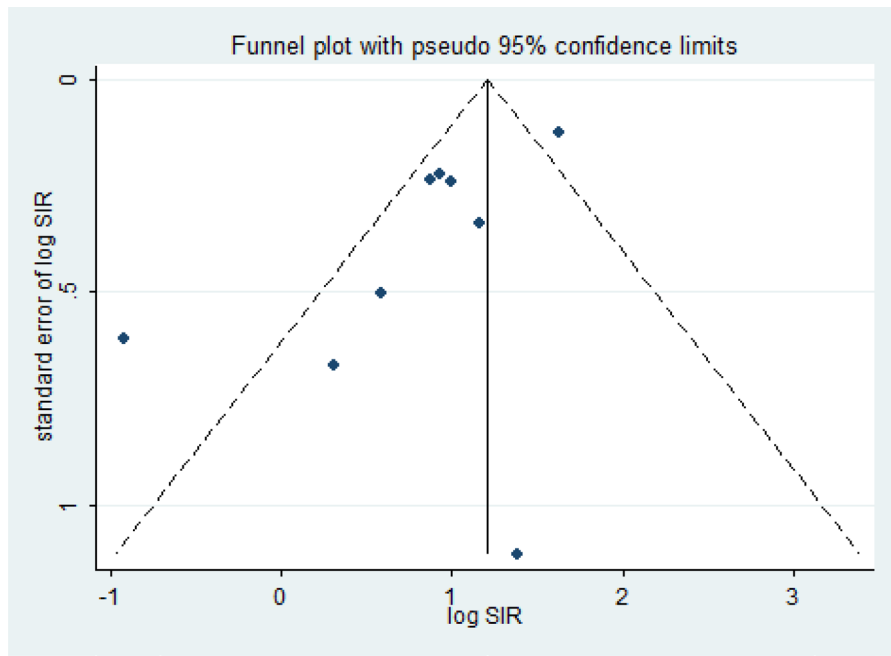

Supplementary Figure 5: Funnel plot for hepatocellular carcinoma (*P* value for Egger: 0.027; *P* value for Begg: 0.917).

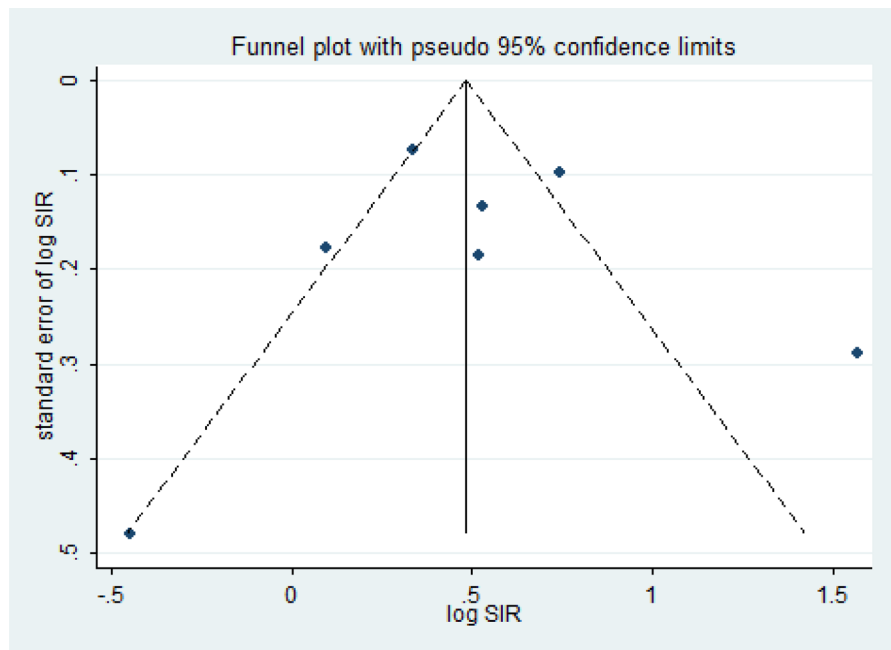

Supplementary Figure 6: Funnel plot for lung cancer (*P* value for Egger: 0.806; *P* value for Begg: 0.764).

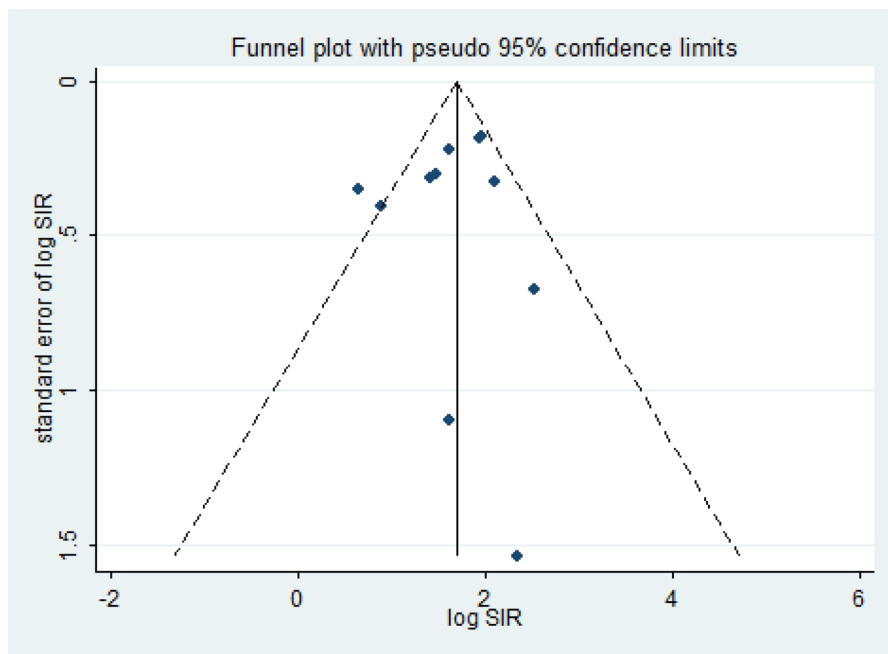

Supplementary Figure 7: Funnel plot for thyroid cancer (*P* value for Egger: 0.528; *P* value for Begg: 0.276).

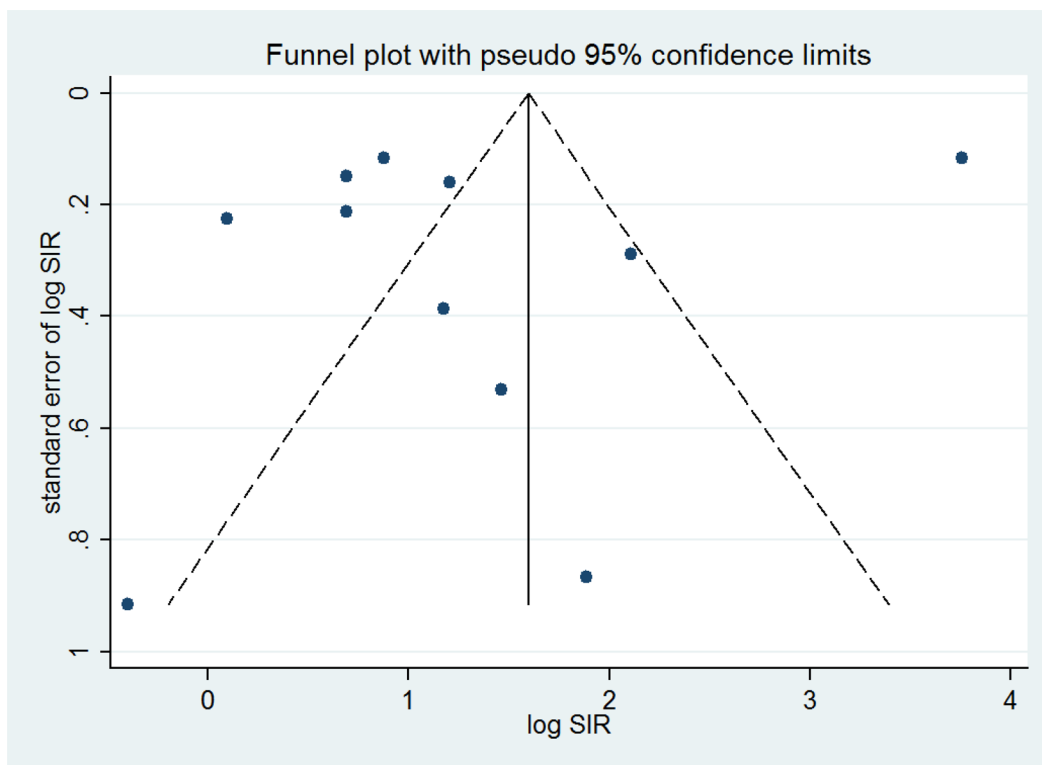

Supplementary Figure 8: Funnel plot for urinary bladder cancer (*P* value for Egger: 0.494; *P* value for Begg: 0.276).

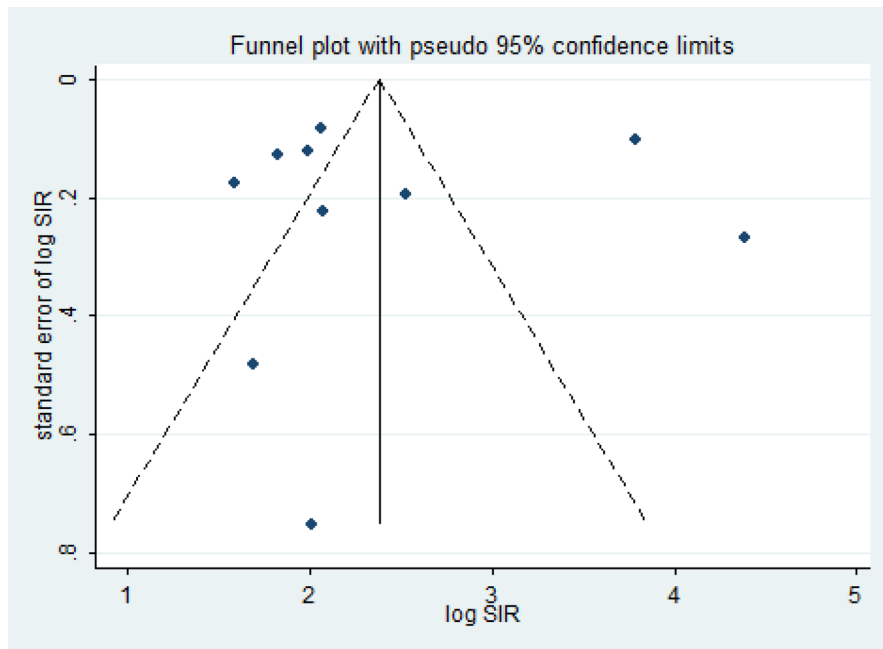

Supplementary Figure 9: Funnel plot for renal cell cancer ( $P$  value for Egger: 0.971;  $P$  value for Begg: 0.350).

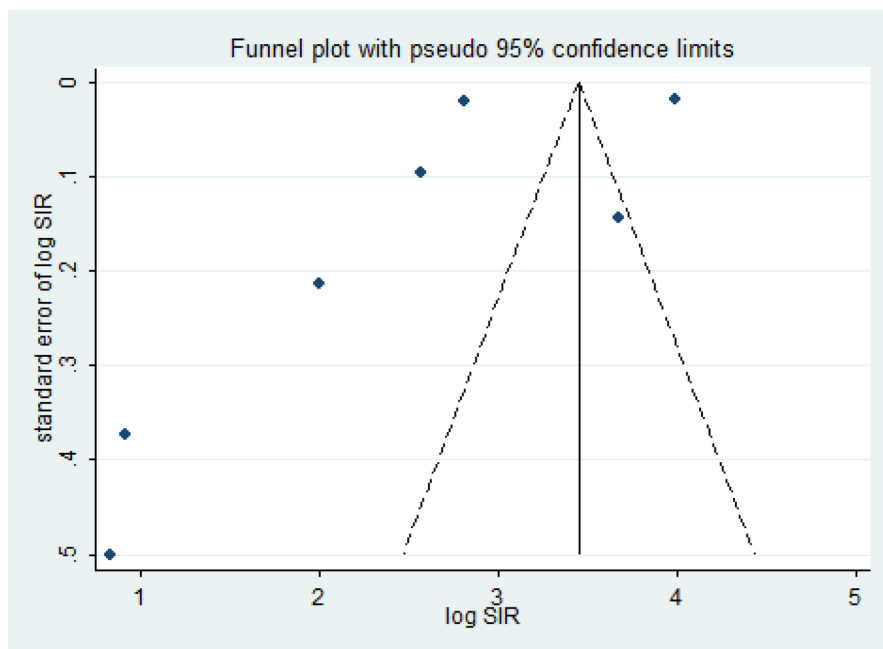

Supplementary Figure 10: Funnel plot for non-melanoma skin cancer ( $P$  value for Egger: 0.490;  $P$  value for Begg: 0.764).

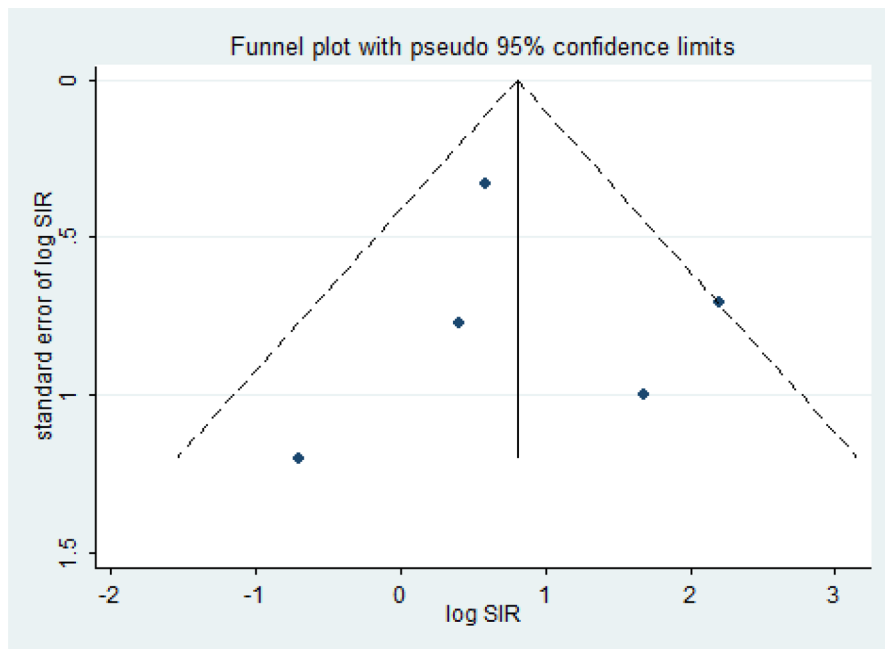

Supplementary Figure 11: Funnel plot for melanoma ( $P$  value for Egger: 0.791;  $P$  value for Begg: 0.806).

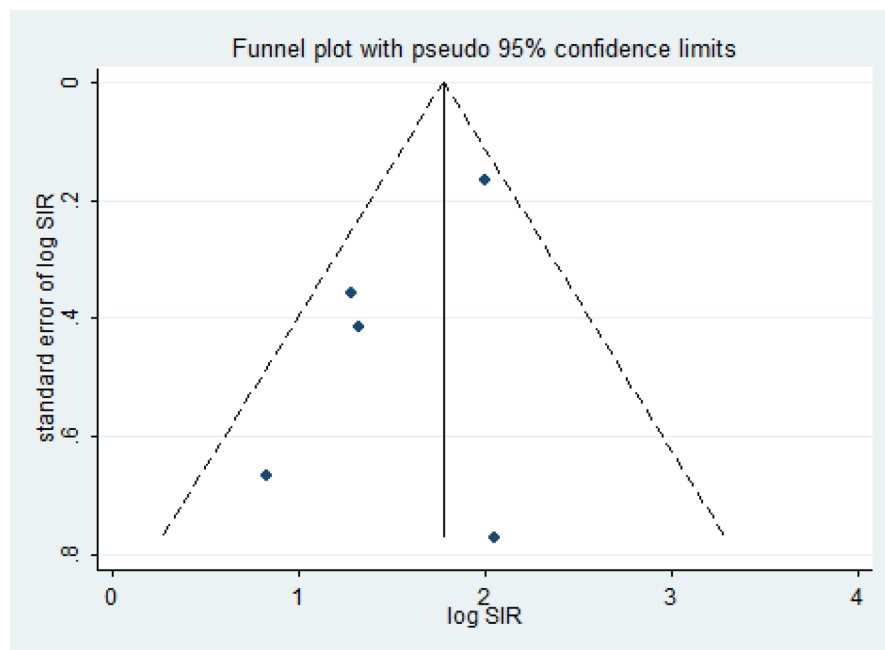

Supplementary Figure 12: Funnel plot for Hodgkin's lymphoma ( $P$  value for Egger: 0.184;  $P$  value for Begg: 1.000).

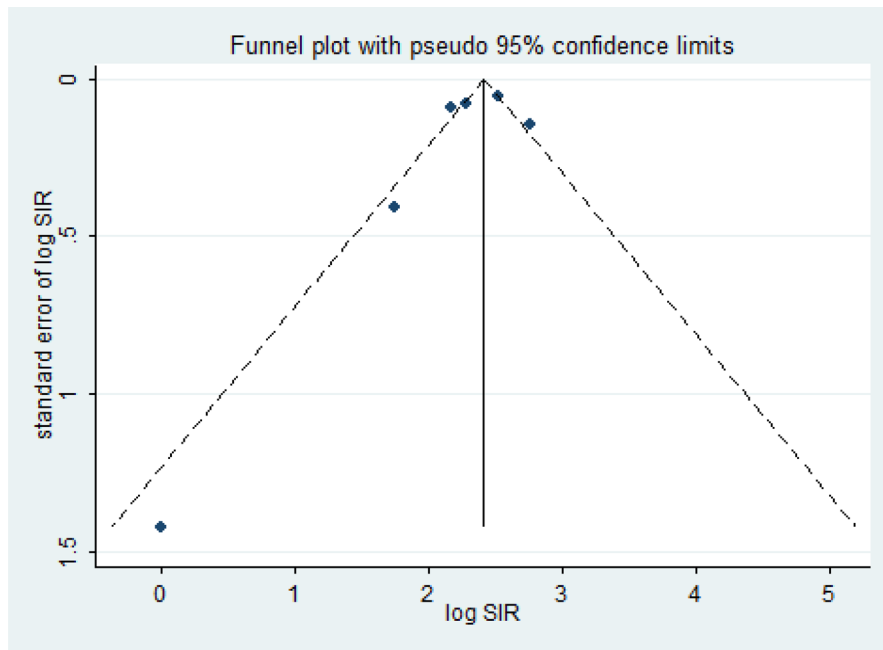

Supplementary Figure 13: Funnel plot for non-Hodgkin's lymphoma ( $P$  value for Egger: 0.366;  $P$  value for Begg: 0.707).

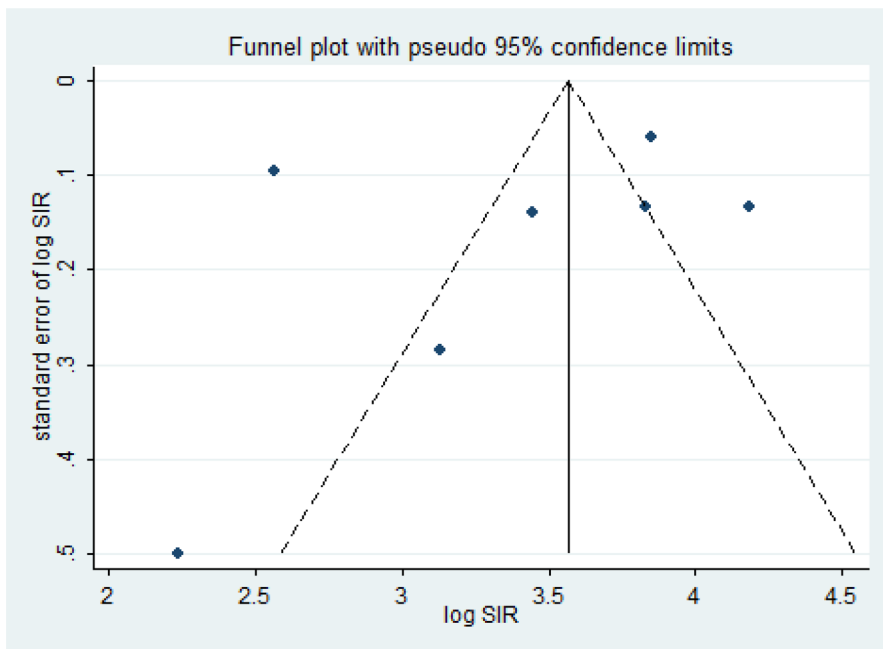

Supplementary Figure 14: Funnel plot for lip cancer ( $P$  value for Egger: 0.583;  $P$  value for Begg: 0.230).

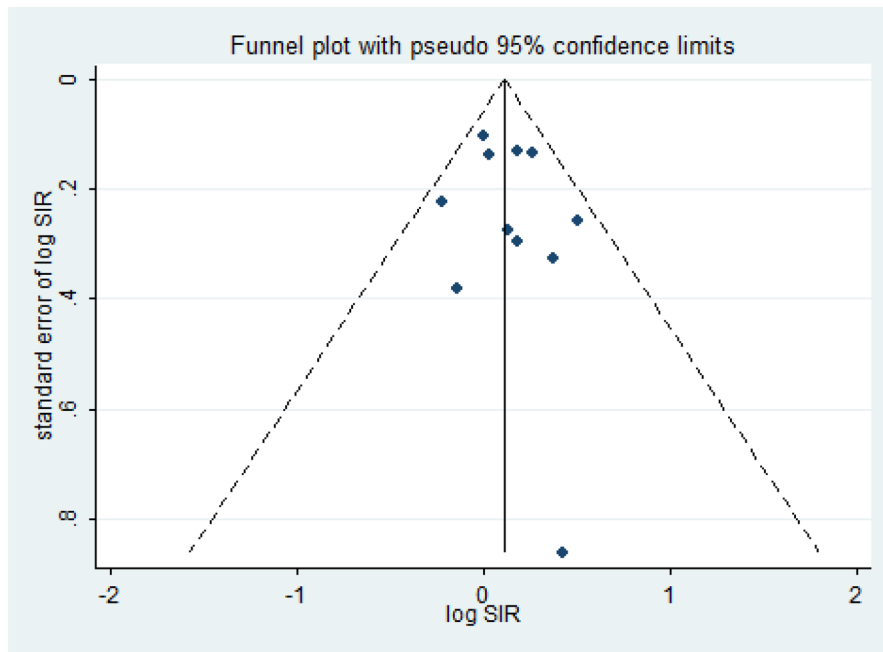

Supplementary Figure 15: Funnel plot for breast cancer (*P* value for Egger: 0.523; *P* value for Begg: 0.755).

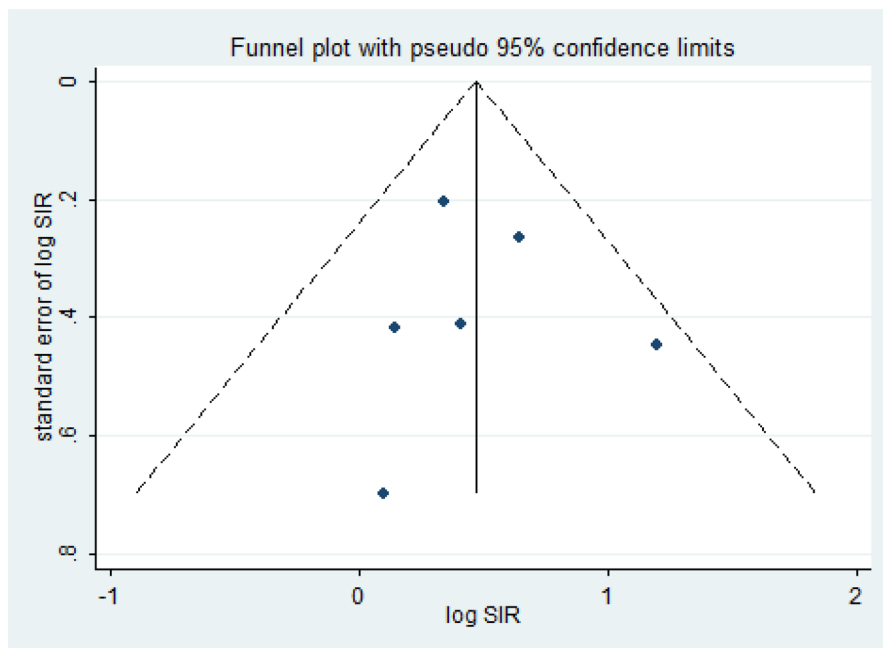

Supplementary Figure 16: Funnel plot for ovarian cancer (*P* value for Egger: 0.859; *P* value for Begg: 0.707).

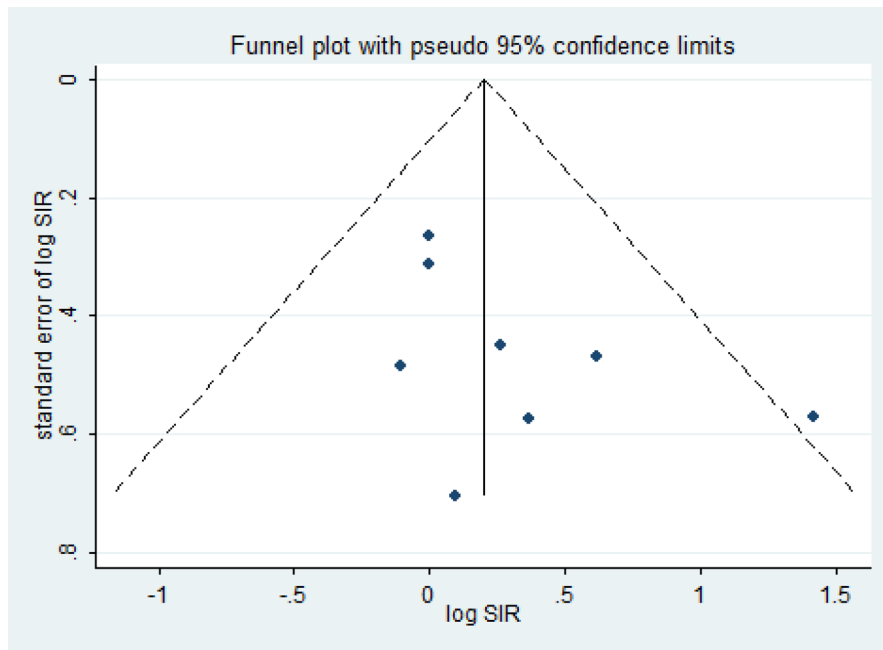

Supplementary Figure 17: Funnel plot for uterus cancer ( $P$  value for Egger: 0.158;  $P$  value for Begg: 0.174).

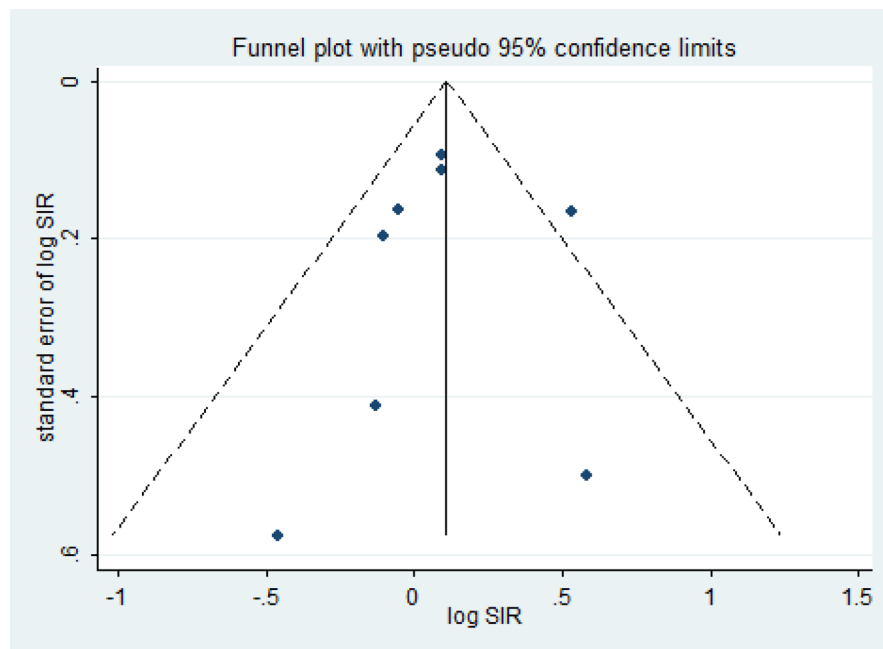

Supplementary Figure 18: Funnel plot for prostate cancer ( $P$  value for Egger: 0.835;  $P$  value for Begg: 0.902).
